1 **Plant trichomes and a single gene *GLABRA1* contribute to insect**  
2 **community composition on field-grown *Arabidopsis thaliana***

3  
4 Yasuhiro Sato<sup>1,2</sup>, Rie Shimizu-Inatsugi<sup>3</sup>, Misako Yamazaki<sup>3</sup>, Kentaro K. Shimizu<sup>3,4\*</sup>, and  
5 Atsushi J. Nagano<sup>5\*</sup>

6  
7 <sup>1</sup>PRESTO, Japan Science and Technology Agency, Kawaguchi 332-0012, Japan

8 <sup>2</sup>Research Institute for Food and Agriculture, Ryukoku University, Yokotani 1-5, Seta Oe-cho,  
9 Otsu, Shiga 520-2194, Japan

10 <sup>3</sup>Department of Evolutionary Biology and Environmental Studies, University of Zurich,  
11 Winterthurerstrasse 190, 8057 Zurich, Switzerland

12 <sup>4</sup>Kihara Institute for Biological Research, Yokohama City University, 641-12 Maioka,  
13 244-0813 Totsuka-ward, Yokohama, Japan

14 <sup>5</sup>Department of Plant Life Sciences, Faculty of Agriculture, Ryukoku University, Yokotani  
15 1-5, Seta Oe-cho, Otsu, Shiga 520-2194, Japan

16 \*Co-corresponding authors: K.K. Shimizu (Phone: +41-44-635-6740) and A.J. Nagano  
17 (Phone: +81-77-599-5656)

18 E-mail address: YS, [sato.yasuhiro.36c@kyoto-u.jp](mailto:sato.yasuhiro.36c@kyoto-u.jp); RSI, [rie.inatsugi@ieu.uzh.ch](mailto:rie.inatsugi@ieu.uzh.ch); MY,  
19 [misako.yamazaki@ieu.uzh.ch](mailto:misako.yamazaki@ieu.uzh.ch); KKS, [kentaro.shimizu@ieu.uzh.ch](mailto:kentaro.shimizu@ieu.uzh.ch); AJN,  
20 [anagano@agr.ryukoku.ac.jp](mailto:anagano@agr.ryukoku.ac.jp)

21  
22 Short title: Field study of insects on *Arabidopsis*

25 **Abstract**

26 **Background:** Genetic variation in plants alters insect abundance and community structure in  
27 the field; however, little is known about the importance of a single gene among diverse plant  
28 genotypes. In this context, *Arabidopsis* trichomes provide an excellent system to discern the  
29 roles of natural variation and a key gene, *GLABRA1*, in shaping insect communities. In this  
30 study, we transplanted two independent glabrous mutants (*gll-1* and *gll-2*) and 17 natural  
31 accessions of *Arabidopsis thaliana* to two localities in Switzerland and Japan.

32 **Results:** Fifteen insect species inhabited plant accessions, with 10–30% broad-sense  
33 heritability of community indices being detected, such as species richness and diversity. The  
34 total abundance of leaf-chewing herbivores was negatively correlated with trichome density  
35 at both the field sites, while glucosinolates had variable effects on leaf chewers between the  
36 two sites. Interestingly, there was a parallel tendency for the abundance of leaf chewers to be  
37 higher on *gll-1* and *gll-2* than for their different parental accessions, *Ler-1* and *Col-0*,  
38 respectively. Furthermore, the loss of function in the *GLABRA1* gene significantly decreased  
39 the resistance of plants to the two predominant chewers, flea beetles and turnip sawflies.

40 **Conclusions:** Overall, our results indicate that insect community composition on *A. thaliana*  
41 is heritable across two distant field sites, with *GLABRA1* playing a key role in altering the  
42 abundance of leaf-chewing herbivores. Given that such a trichome variation is widely  
43 observed in Brassicaceae plants, the present study exemplifies the community-wide impact of  
44 a single plant gene on crucifer-feeding insects in the field.

45 **Keywords:** Brassicaceae; Community genetics; *GLI*; Herbivory; *In natura*; Plant-insect  
46 interaction

47

48

## 49 **Background**

50 Plants develop various resistance traits, such as spines and toxins, to deter herbivory [1]. A  
51 growing number of studies on community genetics has revealed that genetic variation in plant  
52 resistance traits exerts cascading effects on insect abundance and community composition [2,  
53 3, 4, 5]. These insect indices projected on individual plants, called extended phenotype [5],  
54 exhibit heritable variation among plant genotypes [6, 7, 8]. Some researchers have reported  
55 the association of particular genetic polymorphisms with leaf damage [9, 10], insect  
56 abundance [3, 11], and community composition [3] in the field. In comparison, other studies  
57 have focused on how single genes affect the insect community using transformed plants [12,  
58 13]. These lines of evidence from diverse plant species suggest that both quantitative genetic  
59 variation and single genes contribute to the community genetics of plant-insect interaction.

60 *Arabidopsis thaliana* L. (Brassicaceae) is well-studied as a model system of  
61 Brassicaceae-insect interaction [14], within which intensive genomic and phenotypic  
62 information is available for a world-wide collection of natural accessions [15]. In  
63 *Arabidopsis*-herbivore interactions, plant trichomes (epidermal hairs) function as a  
64 mechanical barrier against feeding and oviposition by insect herbivores [11, 16, 17, 18].  
65 Glucosinolates (GLSs) are major secondary metabolites of Brassicales that act as toxic  
66 chemicals against generalists [19, 20], but have the potential to attract specialist herbivores  
67 [14, 21]. For example, previous studies on *A. thaliana* focused on how these physical and  
68 chemical traits confer resistance against specific herbivore species, such as the small cabbage  
69 white butterfly *Pieris rapae* [22, 23], the diamond back moth *Plutella xylostella* [16, 20], and  
70 the green peach aphid *Myzus persicae* [24, 25]. However, knowledge remains limited about  
71 (i) how many insect species occupy *A. thaliana* in the field, (ii) whether plant defense traits  
72 contribute to insect abundance and community composition, and (iii) the host genes that are

73 responsible for community members and overall community composition.

74           Laboratory environments are highly constant compared to naturally fluctuating  
75 environments; consequently, the phenotype in the laboratory might not be adequate to  
76 understand how genes function in the field [26, 27, 28]. The concept of using field studies to  
77 determine gene functions (coined *in natura* study: [26, 28]) is applicable to extended  
78 phenotypes, such as herbivore abundance and communities on plants. The molecular basis of  
79 anti-herbivore defense traits of *A. thaliana* has been studied in laboratory using natural  
80 accessions with respect to trichomes [29, 30, 31] and secondary metabolites [20, 32], and  
81 thus provides an ideal opportunity to distinguish the community-wide effects of single genes  
82 from naturally existing variation in particular defense traits [33]. For example, trichome  
83 density has heritable variation among natural accessions of *A. thaliana* [30, 31, 33]. Loss of  
84 function in a transcriptional factor gene, *GLABRA1* (*GLI*, also called *GLABROUS1*) results  
85 in glabrous phenotypes on leaf and stem surfaces in *A. thaliana* and related species [34, 35,  
86 36, 38, 39] independent of root hair development [34, 40, 41]. Laboratory experiments have  
87 shown that the loss of function in *GLI* decreases resistance against leaf-chewing herbivores  
88 [22], and improves plant growth by saving the cost of defense [26]. However, these genetic  
89 effects remain unexplored in the field.

90           Natural accessions of *A. thaliana* possess various genetic backgrounds regarding  
91 their life-cycles in addition to defense traits [31, 42, 43]. In some geographical regions, a  
92 rapid life-cycle of *A. thaliana* allows themselves to accomplish two or more generations  
93 within a calendar year [42, 43, 44, 45]. The spring cohort of these accessions germinates,  
94 flowers, and produces seeds within spring and early summer. The summer cohort  
95 subsequently occurs that germinates and spends the summer season at a vegetative stage, and  
96 flowers and produce seeds during autumn [43, 44]. These life-cycles of *A. thaliana*

97 accessions depend on the level of seed dormancy which can be attributed to allelic status in  
98 the *DELAY OF GERMINATION1* (*DOG1*) and *DOG6* gene [43, 45, 46], and the duration to  
99 flower development which is determined by *FRIGIDA*, *FLOWERING LOCUS C* and several  
100 other genes [42, 43, 47]. In wild populations of Europe, *A. thaliana* are attacked by  
101 herbivores from late spring to summer: generalist slugs and seed predators occur during late  
102 spring, and during summer various insects, such as beetles, moths, aphids, and  
103 aphidophagous parasitoids, occupy *A. thaliana* [19, 48, 49]. This seasonal schedule leads us  
104 to assume that the summer cohorts of *A. thaliana* should offer an ideal model system between  
105 wild *A. thaliana* and diverse herbivorous insects in the field.

106 Common garden experiments using single-gene mutants provide a powerful tool to  
107 determine the causal link between a particular gene and its phenotypes [38, 42, 50, 51]. In  
108 this study, we transplanted two glabrous mutants and 17 natural accessions of *A. thaliana*, for  
109 which trichome density and glucosinolate concentration vary across plants. In particular, we  
110 focused on *gll-1* and *gll-2* accessions, of which the former is a null trichome mutant derived  
111 from *Ler-1* accession and the latter is a hypomorphic mutant from *Col-0* accession [41, 52].  
112 In addition, the natural accessions were selected to cover variation in trichome density, GLSs  
113 content, and life-cycles [30, 32]. Common garden experiments with these plants were  
114 conducted in the two field sites, Switzerland and Japan, to identify common patterns between  
115 the two insect communities. Three specific questions were addressed: (i) is there heritable  
116 variation in herbivore abundance and community composition on each *A. thaliana* accession;  
117 (ii) which plant trait (physical, chemical, or other life-history traits) does influence herbivore  
118 abundance and community composition; (iii) does the loss of function of a single gene *GLI*  
119 alter insect abundance and community composition?

120

121 **Methods**

122

123 ***Plant materials and defense traits***

124 *Arabidopsis thaliana* L., commonly known as thale cress or mouse-ear cress, is an annual  
125 weed native to Eurasia and naturalized in North America and East Asia [15]. This species is  
126 predominantly self-fertilizing [53] and, when plants are collected from the wild population or  
127 when mutants are isolated by mutagenesis, selfed seeds can be maintained as an inbred line  
128 called an “accession”. Weak dormancy and early-flowering accessions, such as Col-0 and  
129 Ler-1 [45, 46], form both the spring and summer cohort owing to their rapid life-cycle [43].  
130 The spring cohort flowers and seed sets in spring, and then the summer cohort germinates in  
131 early summer and flowers in autumn [43]. The accessions with strong dormancy, such as  
132 Cvi-0 and Shahdara [46], pass summer as seeds, and furthermore the accession with strong  
133 dormancy and late-flowering phenotype, such as Kas-2, are predominantly a winter-annual  
134 that has only one generation within a calendar year [43]. In the wild populations, generalist  
135 slugs and seed weevils feed on *A. thaliana* during late spring, while more diverse herbivores,  
136 such as *Phyllotreta* beetles, green peach aphids *Myzus persicae*, and diamondback moths  
137 *Plutella xylostella*, occur during summer [48, 49]. The summer cohort of *A. thaliana* remains  
138 at the vegetative stage during summer [43] and thereby provides various herbivores with an  
139 opportunity to feed on vegetative plants in the field. We transplanted vegetative *A. thaliana*  
140 during June and July to the field sites to simulate the summer cohorts (see ‘Common garden  
141 experiment’ section for details).

142 To cover wide variation in trichome density (physical defense) and GLS  
143 accumulation (chemical defense) with early- and late-flowering cycles, we selected 17 natural  
144 accessions and two glabrous mutants (Table 1). The natural accessions selected in this study

145 should represent the world-wide genetic variation, because the genome-wide pairwise genetic  
146 distance was 5.7% in median, which is comparable to that of all accessions analyzed by the  
147 1001 Genome Consortium [15]. These 17 accessions include both early- and late-flowering  
148 accessions (e.g. Col-0 and Kas-2 analyzed by Taylor et al. [43]), such that the flowering time  
149 under a long-day laboratory condition ranges from 23 (Ws-2 accession) to 92 days (Br-0  
150 accession) [31]. To examine the effects of plant life-history traits on insect community  
151 composition, we measured and incorporated the plant size and presence of flowering stem  
152 (see ‘Common garden experiment’ and ‘Statistical analysis’ below).

153 To test the functional advantage of *GL1* gene in producing trichomes, we added two  
154 glabrous mutants, *gll-1* and *gll-2*, to the set of natural accessions (Table 1). The former  
155 mutant *gll-1* has the background of *Ler* accession with null mutation due to a 6.5-kb deletion  
156 on *GL1* and lacks leaf surface trichomes. The latter *gll-2* has the background of Col  
157 accession with the deletion of 27 amino acid induced by X-ray radiation, showing  
158 hypomorphic mutation with lower density of trichome on leaf surface [40, 52]. Out of the 17  
159 natural accessions, Br-0 and C24 have no or few trichomes due to a frameshift mutation and  
160 one amino acid change in the myb DNA binding domain of GL1, respectively [30]. We  
161 compiled the data of leaf trichome density (no./cm<sup>2</sup>) from the GWA-portal  
162 (<https://gwas.gmi.oeaw.ac.at/>: [37]).

163 All natural accessions were included in previous quantitative genetic studies of GLS,  
164 of which seven accessions were used as parental genotypes of recombinant inbred lines (e.g.,  
165 Col × *Ler* and Cvi × *Ler* [20]; Bay × Sha [54]; Kas × Tsu [55]) and the other accessions were  
166 used in a genome-wide association mapping [34]. To test whether genetic potentials in GLS  
167 profiles explain herbivory rate, we used the data in Chan et al. [32] on 21 GLSs of 96 *A.*  
168 *thaliana* accessions using a mature leaf at 35-days post germination from a plant grown under

169 short-day laboratory conditions without herbivory. As they performed two trials to quantify  
170 GLS, we used the average GLS contents (nmol/mg flesh weight). We focused on variation in  
171 aliphatic GLSs and its chain-length, because these parameters play a major role in preventing  
172 above-ground herbivory [50, 56, 57]. Regarding the data of Chan et al. [32], we applied a  
173 principal component analysis (PCA) to Total C3-, C4-, C5-, C7-, and C8- aliphatic GLSs. The  
174 first and second principal components explained 44% and 33% variation in the GLS profiles  
175 among our 17 accessions, respectively (Fig. S1); therefore, these two components were used  
176 in our statistical analyses.

177

### 178 *Common garden experiment*

179 We used the experimental gardens of the University of Zurich at Irchel campus (Zurich,  
180 Switzerland: 47° 23' N, 8° 33' E, alt. ca. 500 m) and the Center for Ecological Research,  
181 Kyoto University (Otsu, Japan: 35° 06' N, 134° 56' E, alt. ca. 200 m) (Fig. 1). The Zurich site  
182 is close to a deciduous forest and the surroundings of the common garden are covered with  
183 concrete tiles to prevent weeds. The Otsu site is a suburb of cultivated fields and the ground  
184 of the study site is covered with short grasses. In the Otsu site, the grass weeds were mown  
185 and the surroundings were covered with agricultural sheets before the experiment. At both  
186 sites, no large *Brassica* plants occur during early summer. Average air temperature and total  
187 precipitation was 19 °C and 198 mm in Zurich (during July 2016; MeteoSwiss,  
188 <http://www.meteoswiss.admin.ch/home.html>) and 22 °C and 321 mm in Otsu (during June  
189 2016; Japan Meteorological Agency, <http://www.jma.go.jp/jma/index.html>).

190 We prepared 10 replicates of 19 accessions (= 190 plants in total) for each  
191 experiment. Experimental plants were initially grown in an environmental chamber, and were  
192 then transferred to the outside garden. To cultivate plants, we used mixed soils of agricultural



193 composts (Profi Substrat Classic CL ED73, Einheitserde Co. in Switzerland; MetroMix 350,  
194 SunGro Co. in Japan) and perlites with a compost to perlite ratio of 3:1 litter volume. No  
195 additional fertilizers were supplied because the agricultural soils contain fertilizers. Seeds  
196 were sown on the soil and stratified under constant dark conditions at 4–5 °C air temperature  
197 for a week. Plants were then grown under short-day condition (8h:16h light:dark [L:D], 20 °C  
198 air temperature, and 60% relative humidity) for 1 month to prevent flowering before the field  
199 experiment. The plant positions were rotated every week to minimize the growth bias by light  
200 condition. Plant individual was moved to a plastic pot (7.5-cm diameter, with 6.5-cm depth in  
201 Japan; 6.0 × 6.0 × 6.0 cm in Switzerland), and acclimated for 3 days at shaded outdoor place  
202 before the field experiments. The potted plants were randomly placed among three blocks in  
203 each common garden: 68, 69, and 53 plants were assigned within each block in Zurich; and  
204 76, 76 and 38 plants were assigned within each block in Otsu. The potted plants were set in a  
205 checkered manner within a block without being embedded in the ground on water-permeable  
206 plastic sheet. Each block was more than 1.0 m apart from each other. These experiments were  
207 conducted from June 18 to July 1, 2016 in Otsu; and from July 13 to August 3, 2016 in  
208 Zurich. Plants were watered every three days in Otsu and every day in Zurich.

209         Insect and herbivorous collembola on individual plants were visually counted every  
210 2–3 days. These species were identified ocularly with a magnifying glass. Dwelling traces  
211 and mummified aphids were also counted as a proxy of the number of leaf miners and  
212 parasitoid wasps, respectively. Eggs, larvae, and adults were counted for all species, as long  
213 as they could be observed by the naked eye. The abundance of each species was evaluated by  
214 the cumulative number of individuals over the experimental period to reflect herbivory load  
215 on plants [58]. Small holes made by flea beetles were counted at the Zurich site and the  
216 maximum number throughout the experiment was used as an indicator of damage by flea

217 beetles; however, this phenotyping was difficult in Japan, due to heavier and simultaneous  
218 infestation by sawflies. We attempted, but failed, to evaluate leaf damage in Japan because  
219 about one third of individual plants were dead by the end of the experiment due to high air  
220 temperature in June. All counting was conducted by a single observer during the daytime  
221 (08:00–17:00), and was continued for 3 weeks after the beginning of the field experiment.

222 We recorded the initial plant size and presence/absence of flowering stems to  
223 incorporate the effects of plant life-history traits on insect abundance. Initial plant size was  
224 evaluated by the length of the largest rosette leaf (mm) at the beginning of the field  
225 experiment, because this parameter represents plant size at the growth stage. The  
226 presence/absence of flowering stems was recorded 2 weeks after transplanting plants.

227

## 228 *Statistical analysis*

229 *Response variables* - Community indices were examined at three levels (i.e., component  
230 species, guilds, and entire communities) as response variables in the following analyses. At  
231 the species level, we analyzed the number of individuals of each herbivorous species. We  
232 analyzed species for which more than 20 individuals were observed in each site, because  
233 statistical tests were difficult to apply to rare species. For the Zurich data, we analyzed the  
234 number of leaf holes as an indicator of damage by flea beetles. At the guild level, we  
235 classified herbivorous species into those feeding on external leaf tissues (i.e., leaf chewers)  
236 and those feeding on internal plant tissues (including sap suckers and leaf miners). We also  
237 separated herbivorous species into specialists on Brassicaceae (e.g., white butterflies, cabbage  
238 sawflies, and turnip flea beetles) and generalists on multiple plant families (some species of  
239 aphids and thrips) (Table 2; Fig. S2). The total number of insect individuals in each category  
240 was analyzed as guild level statistics. At the entire community level, we calculated species

241 richness (i.e., number of species), Shannon's diversity index  $H'$ , and the total number of  
242 insect individuals on individual plants. All of the response variables were  $\ln(x +$   
243  $1)$ -transformed to improve a normality before statistical analyses. All statistical analyses were  
244 conducted using R version 3.2.0 [59]. We utilized the *rda* function (in the *vegan* package:  
245 [60]) to perform the redundancy analysis. We used the *lme* function (in the *nlme* package:  
246 [61]) to estimate heritability, as described below.

247 *Variation in insects on plant accessions* - To quantify variation in insect communities  
248 among plant accessions and study sites, we performed a redundancy analysis to partition  
249 sources of variation in community composition into the plant accession, study sites, and  
250 accession-by-site effects. The accession-by-site interaction was first analyzed by 999-times  
251 permutation tests, and then the main effects of accessions and sites were examined without  
252 the interaction term. Then, we estimated broad-sense heritability  $H^2$  in a focal response, as the  
253 proportion of variance attributable to plant accessions. We used linear mixed models, in which  
254 the accession ID was assigned as a random effect. This variance component of random effect  
255 was estimated by the restricted maximum likelihood method [62, 63]. The significance of  
256 heritability was examined by likelihood ratio tests by comparing the linear models with or  
257 without the random effect of accession ID. This estimation of heritability was separately  
258 performed for the data from Zurich and Otsu.  $P$ -values were corrected by the false discovery  
259 rate (FDR) of multiple testing [64]. Another option of estimating heritability is to incorporate  
260 a genetic distance matrix among natural accessions, as used in genome-wide association  
261 studies [e.g. 65, 66]. However, it was difficult to apply the same approach to single-gene  
262 mutants and the limited number of accessions; thus, we adopted the linear mixed models  
263 without the distance matrix to estimate broad-sense heritability.

264 *Effects of plant traits* - To address whether particular plant traits contributed to

265 community members and composition, we used multiple regressions that considered trichome  
266 density, PC1 and PC2 of aliphatic GLSs, the presence/absence of flowering stems, and initial  
267 plant size (mm) as explanatory variables. No explanatory variables were heavily correlated  
268 with each other ( $|r| < 0.6$  for all pairs). We considered the difference of experimental block as  
269 a covariate. Because trichome density had a highly skewed distribution, due to completely  
270 glabrous phenotypes, this variable was  $\ln(x + 1)$ -transformed before the analysis. First, we  
271 tested the effects of plant traits on each response variable without the dataset on glabrous  
272 mutants. When detecting significant effects of trichomes on a particular herbivore, we then  
273 compared two glabrous mutants and their parental accessions to test how the *GLI* genes  
274 impact guild and community indices encompassing the focal herbivore. Linear mixed models  
275 were used to analyze trichome production, initial plant size (mm), and the presence/absence  
276 of flowering stems as explanatory variables. The difference in parental background (i.e.,  
277 *Ler-1* or *Col-0*) was considered as a random effect. We used the *lme* function with the  
278 maximum likelihood method for these mixed models. All of the continuous response and  
279 explanatory variables were standardized following a normal distribution, with zero mean and  
280 one variance, to make coefficients comparable between the linear models. *P*-values were  
281 corrected by FDR [64].

282

## 283 **Results**

284

### 285 *Abundance and communities of insects among plant accessions and study sites*

286 We observed 15 insect species including flea beetles, sawflies, butterflies, moths, aphids, and  
287 thrips on *A. thaliana* in the two field experiments (Table 2; Fig. 1). Of these insects, 5 and 3  
288 species were specific to the Otsu and Zurich site, respectively. Redundancy analysis and

289 permutation tests confirmed that the plant accession, study site, and accession-by-site effects  
290 exhibited significant sources of variation in the community composition (Accession, Sum of  
291 Squares (SS) = 0.99,  $F = 1.57$ ,  $P < 0.001$ ; Site, SS = 1.31,  $F = 36.2$ ,  $P < 0.001$ ;  
292 Accession-by-site, SS = 0.96,  $F = 1.54$ ,  $P < 0.001$  with 999 permutations; Fig. 2). We found  
293 significant broad-sense heritability in species richness, Shannon diversity, and total  
294 abundance of insects on *A. thaliana*, and its magnitude varied between two study sites  
295 (10–11% and 15–30% heritability in Zurich and Otsu, respectively: Table 3). When each  
296 community member was analyzed separately, we found significant 16% and 33% heritability  
297 in the abundance of two predominant herbivores, the striped flea beetle *P. striolata* in Zurich  
298 and the turnip sawfly *A. rosae* in Otsu, respectively (Table 3). We detected 40% heritability in  
299 the number of leaf holes made by flea beetles in Zurich (Table 3). At both sites, significant  
300 heritability was detected in the number of herbivorous individuals for each of the leaf chewer,  
301 specialist, and generalist guilds rather than in single species (Table 3). Even when the two  
302 mutants *gll-1* and *gll-2* were eliminated from our dataset, heritability remained at a similar  
303 level with respect to the abundance of the two predominant herbivore species (striped flea  
304 beetle in Zurich,  $H^2 = 0.20$ ,  $\text{LR-}\chi^2_1 = 16.3$ ,  $P_{\text{fdr}} < 0.001$ ; turnip sawfly in Otsu,  $H^2 = 0.31$ ,  
305  $\text{LR-}\chi^2_1 = 32.3$ ,  $P_{\text{fdr}} < 10^{-6}$ ), the abundance of leaf-chewing herbivores (Zurich,  $H^2 = 0.13$ ,  
306  $\text{LR-}\chi^2_1 = 14.2$ ,  $P_{\text{fdr}} < 0.001$ ; Otsu,  $H^2 = 0.28$ ,  $\text{LR-}\chi^2_1 = 27.6$ ,  $P_{\text{fdr}} < 10^{-6}$ ), and insect species  
307 richness (Zurich,  $H^2 = 0.14$ ,  $\text{LR-}\chi^2_1 = 8.7$ ,  $P_{\text{fdr}} < 0.01$ ; Otsu,  $H^2 = 0.28$ ,  $\text{LR-}\chi^2_1 = 27.3$ ,  $P_{\text{fdr}} <$   
308  $10^{-6}$ ).

309

### 310 ***Plant traits underlying the abundance and communities of insects***

311 We examined whether the species, guild, and community structure of insects were affected by  
312 trichome density, glucosinolates, and life-history traits among natural accessions (Fig. 3).

313 Significant effects of trichomes at the species and guild levels were observed (Fig. 3; Table  
314 S1). Two predominant leaf chewers, the striped flea beetle in Zurich and the turnip sawfly in  
315 Otsu, occurred less on hairy accessions than on accessions that produced low quantities of  
316 trichomes (Fig. 3, 4b; Table S1). The number of leaf holes was smaller on hairy plants  
317 compared to glabrous plants at the Zurich site (Fig. 3, 4a; Table S1), indicating that trichomes  
318 have a resistance function against flea beetles. At the Otsu site, the abundance of the eggs and  
319 larvae of the small cabbage white butterfly *Pieris rapae* was also low on hairy plants (Fig. 3;  
320 Table S1). At the guild level, trichomes had significant negative effects on the leaf chewers at  
321 both sites (Fig. 3, 4c, 4d; Table S1). In contrast to trichomes, aliphatic GLSs did not have any  
322 consistent effects on herbivore abundance. The first principal component of GLSs had  
323 negative effects on leaf chewers, specialist herbivores, species richness, and total abundance  
324 at the Zurich site but no significant effects on these indices at the Otsu site (Fig. 3). The  
325 second principal component of GLSs was positively correlated with the abundance of turnip  
326 sawfly at the Otsu site and western flower thrips at the Zurich site (Fig. 3: Table S1). These  
327 effects of trichomes and GLSs were variable between the two sites with respect to insect  
328 richness, Shannon diversity, and total abundance (Fig. 3, 4e, 4f; Table S1). Initial plant size or  
329 the presence of flowering stems significantly increased insect richness, diversity, and total  
330 abundance at the both sites (Fig. 3; Table S1). The result that Kas-2 in Otsu and C24 in  
331 Zurich were less likely occupied by leaf chewers (Fig. 4) was due to its small plant size.

332

### 333 ***Comparing glabrous mutants and parental hairy accessions***

334 We examined the effects of a single gene *GLABRA1* on herbivory, guild, and community  
335 indices encompassing two predominant leaf chewers, flea beetles and sawflies. At the species  
336 level, compared to parental accessions, two glabrous mutants had significantly more leaf

337 holes made by the flea beetles and larvae of the turnip sawfly (Fig. 4a, 4b; Table S2). At the  
338 guild level, leaf chewers tended to occur more often on two glabrous mutants than on each of  
339 the parental accessions (Fig. 4c, 4d), although this difference was not statistically significant  
340 in Zurich (Table S2). Among community indices, total abundance at the Otsu site was  
341 significantly lower on glabrous mutants than on hairy parents (Fig. 4e, 4f) (coef.  $\pm$  SE = -0.46  
342  $\pm$  0.16,  $Z = -2.86$ ,  $P < 0.01$ ; Table S2).

343

344

## 345 **Discussion**

346 *Arabidopsis thaliana* is the best-studied plant in laboratories, and is distributed across the  
347 temperate region [15]. Several researchers have studied leaf herbivory [17, 50, 56],  
348 herbivorous fauna [19, 48, 49, 67], and plant fitness [17, 48, 50, 56] in *A. thaliana* under field  
349 conditions; however, quantitative evidence remains limited in relation to insect community  
350 composition on this plant species. In the present study, we found that the community  
351 composition of 15 arthropod species was a significantly heritable phenotype for *A. thaliana* in  
352 the two distant field sites. Importantly, the loss of function of the *GLABRA1* (*GLI*) gene  
353 significantly decreased plant resistance against two predominant chewers, flea beetles and  
354 sawflies, at the species level. At the guild level, both *gll-1* and *gll-2* mutant plants were more  
355 likely to be inhabited by leaf chewers than each of their hairy parents *Ler-1* and *Col-0* at both  
356 the Zurich and Otsu sites (Fig. 1c, 1d). The parallel pattern in *gll-1* and *gll-2* suggests that  
357 the single gene *GLI* contributes to community composition. These results demonstrate that  
358 variation in a single gene contributes towards shaping insect communities through its impacts  
359 on leaf-chewing herbivores.

360

361 ***Heritable variation in insect community composition***

362 Despite the large difference in insect community composition, we consistently found  
363 significant heritability and effects of trichomes in the two field sites. Our estimated  
364 heritability seems moderate (Table 3), but is comparable with the other studies reporting less  
365 than 50% heritability in insect abundance and community composition [6, 7, 8]. Using plant  
366 genotypes propagated from seeds, Johnson and Agrawal [6] showed that heritability in insect  
367 species richness on the perennial *Oenothera biennis* ranged from 10 to 40%, depending on  
368 habitat conditions. Our present study also used *A. thaliana* accessions with unique genetic  
369 backgrounds, resulting in the moderate heritability of species richness and diversity. We also  
370 found that the presence of flowering stems or larger plant size increased species richness and  
371 diversity (Fig. 3; Table S1). Plant apparency hypothesis posed the importance of such plant  
372 life-history traits in anti-herbivore defense [68], and this hypothesis has been recently  
373 supported by a meta-analysis [69], comparative study [70], and genome-wide association  
374 mapping [65]. In the context of community genetics, plant life-history traits are a key  
375 predictor of insect community composition on perennial herbs [6] and woody plants [2]. Our  
376 present study supports the plant apparency hypothesis at the community level of insects on *A.*  
377 *thaliana*.

378 Consistent with our results in the Zurich site, Harvey et al. [49] found that *A.*  
379 *thaliana* plants sown in summer were heavily attacked by *Phyllotreta* beetles and also  
380 harbored by diamondback moths and aphids in the Netherlands. By simulating a summer  
381 cohort of *A. thaliana* with various background accessions of flowering time and seed  
382 dormancy, our present study showed the importance of plant life-history traits in organizing  
383 the summer insect community. In the seasonal context, the parental accessions of two  
384 glabrous mutants, Col-0 and Ler-1, have a weak dormancy allele of *DELAY OF*



385 *GERMINATION (DOGI)* [46], which allows *A. thaliana* to germinate during summer [43,  
386 45] and thus to serve as food plants for summer herbivores in the field. As we have shown the  
387 defense advantage of producing leaf trichomes, the present field experiment could represent  
388 how the loss of function in *GLI* imposes summer herbivory on weak dormancy accessions.  
389 The seasonality of plant defense would motivate us to further study epistasis or pleiotropy  
390 among genes involved in antiherbivore defense and seasonal phenology of *A. thaliana*.

391

### 392 ***Effects of the single gene GLABRA1 on insect abundance***

393 In reverse genetic analysis, multiple independent mutants with a consistent phenotype are  
394 required to prove the function of a particular gene. In addition, using multiple genetic  
395 backgrounds of parent can also give a strong proof of a gene function. In a previous study, the  
396 roles of single genes related to GLS biosynthesis in modulating herbivory were quantified  
397 using mutants derived from a single parental accession, Col-0 [50]. Our common garden  
398 experiments illustrate the function of *GLI* gene against herbivory *in natura* using two distinct  
399 lines, *Ler (gll-1)* and *Col (gll-2)*. To date, several studies have reported associations between  
400 *GLI* polymorphism and anti-herbivore functions in field populations of *A. lyrata* [9, 10] and  
401 *A. halleri* [11, 18]. Plant trichomes also prevent herbivory by sawflies [71] and flea beetles  
402 [72, 73] on *Brassica* cultivars. Together with these results, our present results indicate that  
403 plant trichomes and a single gene *GLI* play a key role in physical defense against crucifer  
404 feeders.

405 Laboratory experiments on single-gene mutants and natural accessions of *A. thaliana*  
406 suggested that plants with high trichome density resisted infestation by aphids [25, 74].  
407 Under the two tested field conditions, trichomes had no significant effect on the abundance of  
408 aphids, possibly because aphids primarily occurred on flowering stems, on which the

409 trichome density is low. In fact, the presence of flowering stems was positively correlated  
410 with the abundance of aphids (Table S1). These results support the limited associations  
411 between aphid abundance and *GLI* polymorphism detected in field-grown *A. halleri* [11]. In  
412 addition, we could not detect any significant effects of trichomes and *GLI* on the abundance  
413 of larval *P. xylostella*, even though trichomes prevent adult moths ovipositing on *A. thaliana*  
414 under laboratory conditions [16]. Handley et al. [16] focused on several northern accessions  
415 of *A. thaliana*, whereas the current experimental setting covers a wider geographical range of  
416 natural accessions. A recent genome-wide association study using 350 natural accessions also  
417 found no significant association between *GLI* polymorphism and herbivory by *P. xylostella*  
418 [66]. Combined with the previous studies, our present results from field-grown *Arabidopsis*  
419 exemplify the importance of testing diverse accessions and environmental conditions.

420         Although several studies on *Nicotiana* plants illustrated the effects of single  
421 jasmonate signaling genes on herbivore abundance and communities, silencing jasmonate  
422 pathway results in complex pleiotropy on multiple defense traits in leaves and flowers [12, 13,  
423 75, 76]. In contrast, *Arabidopsis* trichomes have a simple molecular mechanism that allows  
424 *GLI* to be a prime candidate gene for physical defense without pleiotropy. Loss of function  
425 mutants in a few transcriptional factor genes (including *GLABRA1 (GLI)*, *GLABRA2*,  
426 *GLABRA3*, *TRANSPARENT TESTA GLABRA1*) result in glabrous phenotypes in *A. thaliana*.  
427 While the loss of function of the latter three genes results in pleiotropic defects in root hairs,  
428 the loss of function of *GLI* does not affect root hairs, due to the subfunctionalization of *GLI*  
429 and its homolog *WEREWOLF* [34, 35, 41, 52]. Indeed, many independent null or  
430 hypomorphic mutations of *GLI* have been reported in natural accessions of *A. thaliana* [30,  
431 37]. Of note, the Br-0 and C24 accessions were the most susceptible accessions to leaf  
432 chewers at each site (Fig. 4c, 4d), and have disruptive mutations on *GLI* [30, 37]. Based on

433 genetic regulatory systems and natural variation, the present findings on *GLI* confer an  
434 evolutionary implication to its functional advantage in producing trichomes against  
435 herbivory.

436

#### 437 ***Varying effects of chemical defense on specialist herbivores***

438 Glucosinolates act as a chemical defense against herbivory [19, 20, 56, 57]; however, some  
439 specialist herbivores overcome GLSs [20, 57, 77, 78]. Because the insect communities  
440 observed here were mainly composed of specialist herbivores (Table 2), aliphatic GLSs might  
441 have had variable effects in our present study. Specifically, the striped flea beetle *P. striolata*  
442 efficiently sequesters 4-methylthiobutyl from *A. thaliana*, a short-chain aliphatic GLS [78].  
443 The larvae of *A. rosae* sawflies also sequester GLSs [77], whereas adults utilize  
444 isothiocyanates, which are breakdown products of aliphatic GLSs, to find host plants [21].  
445 The sequestration and host-finding might explain the result that some components of GLSs  
446 had negative effects whereas the others had no or positive effects on the abundance of  
447 specialist herbivores.

448         The present study utilized GLS data quantified under laboratory conditions with an  
449 aim to address whether genetically based variation in GLSs is associated with insect  
450 communities. However, these genetic potentials might be insufficient to reflect the effects of  
451 GLSs on herbivore abundance in the field, due to phenotypic plasticity and induced response  
452 of GLSs to herbivory [23, 24, 50]. For example, the green peach aphid *M. persicae* and the  
453 cabbage white butterfly *P. rapae* can modify the expression level of the *MAMI* gene, which  
454 involves a chain elongation of aliphatic GLS [23, 24]. In a field study, Kerwin et al. [50]  
455 found gene-by-environmental effects on GLS profiles and herbivory on *A. thaliana*, and these  
456 effects varied considerably among study years and sites. Multi-year surveys are therefore

457 needed to reveal under what conditions GLS profiles contribute to shaping insect community  
458 composition.

459

#### 460 **Conclusion**

461 Our field investigation showed a genetic basis in the insect community assemblage on *A.*  
462 *thaliana*, and the advantage of the functional allele of *GLI* in avoiding leaf chewers. In  
463 Brassicaceae plants, evidence is accumulating to suggest that genetic variation within a plant  
464 species alters insect community composition and, in turn, exerts selection on plant defense [4,  
465 79, 80]. Variation in the trichome density is also observed across Brassicaceae plants [71, 72,  
466 73], where *GLI* orthologs affect the trichome density [81]. In the context of community  
467 genetics, the present study on *GLI* provides evidence of a key gene affecting the community  
468 composition of crucifer-feeding insects. Future study should assess the relative importance of  
469 single genes and quantitative genetic variation towards a complete understanding of plant  
470 genetic effects on insect community assembly.

471

#### 472 **Abbreviation**

473 *GLI*: *GLABRA1*; GLS: glucosinolate; PCA: principal component analysis; RDA: redundancy  
474 analysis; FDR: false discovery rate

475

#### 476 **Acknowledgements**

477 The authors thank Jordi Bascompte and Matthew Barbour for their valuable discussions, and  
478 Satoshi Oda and Aki Morishima for helping with plant cultivation and fieldwork.

479

#### 480 **Funding**

481 This study was supported by JSPS Postdoctoral Fellowship (Grant Number, 16J30005) and  
482 JST PRESTO (JPMJPR17Q4) to Y.S., JST CREST (JPMJCR15O2) and JSPS KAKENHI  
483 (JP16H06171 and JP16H01473) to A.J.N., Swiss National Foundation, URPP Global Change  
484 and Biodiversity of the University of Zurich, JST CREST (JPMJCR16O3), Japan to K.K.S.  
485 The field experiment in Japan was supported by the Joint Usage/Research Grant of Center for  
486 Ecological Research, Kyoto University.

487

#### 488 **Availability of data and source codes**

489 The data and R source code are included in the online supplementary material  
490 (Additional\_file1\_Data.xls; Additional\_file2\_Rscript.txt).

491

#### 492 **Authors' contributions**

493 Y.S., R.S.I., and M.Y. performed the field experiment. Y.S. analyzed the data. Y.S., R.S.I.,  
494 K.K.S., and A.J.N. designed the project and wrote the manuscript with input from all  
495 co-authors.

496

#### 497 **Ethics approval and consent to participate**

498 Not applicable.

499

#### 500 **Consent for publication**

501 Not applicable.

502

#### 503 **Competing interests**

504 The authors declare that they have no competing interests.

505

506 **References**

- 507 1. Schoonhoven LM, van Loon JJA, Dicke M. Insect-plant biology. 2nd ed. Oxford, UK:  
508 Oxford University Press; 2005.
- 509 2. Barbour MA, Rodriguez-Cabal MA, Wu ET, et al. Multiple plant traits shape the genetic  
510 basis of herbivore community assembly. *Funct Ecol.* 2015;29:995–1006.
- 511 3. Bernhardsson C, Robinson KM, Abreu IN, et al. Geographic structure in metabolome and  
512 herbivore community co-occurs with genetic structure in plant defence genes. *Ecol Lett.*  
513 2013;16:791–8.
- 514 4. Poelman EH, van Dam NM, van Loon JJA, Vet LE, Dicke M. Chemical diversity in  
515 *Brassica oleracea* affects biodiversity of insect herbivores. *Ecology.* 2009;90:1863–77.
- 516 5. Whitham TG, Bailey JK, Schweitzer JA, et al. A framework for community and  
517 ecosystem genetics: from genes to ecosystems. *Nat Rev Genet.* 2006;7:510–23.
- 518 6. Johnson MTJ, Agrawal AA. Plant genotype and environment interact to shape a diverse  
519 arthropod community on evening primrose (*Oenothera biennis*). *Ecology*, 2005;86:874–  
520 85.
- 521 7. Keith AR, Bailey JK, Whitham TG. A genetic basis to community repeatability and  
522 stability. *Ecology.* 2010;91:3398–406.
- 523 8. Maddox GD, Root RB. Resistance to 16 diverse species of herbivorous insects within a  
524 population of goldenrod, *Solidago altissima*: genetic variation and heritability. *Oecologia.*  
525 1987;72:8–14.
- 526 9. Kivimäki M, Kärkkäinen K, Gaudeul M, et al. Gene, phenotype and function:  
527 *GLABROUS1* and resistance to herbivory in natural populations of *Arabidopsis lyrata*.  
528 *Mol Ecol.* 2007;16:453–62.

- 529 10. Løe G, Toräng P, Gaudeul M, Ågren J. Trichome production and spatiotemporal variation  
530 in herbivory in the perennial herb *Arabidopsis lyrata*. *Oikos*. 2007;116:134–42.
- 531 11. Sato Y, Kudoh H. Tests of associational defence provided by hairy plants for glabrous  
532 plants of *Arabidopsis halleri* subsp. *gemmaifera* against insect herbivores. *Ecol Entomol*.  
533 2015;40:269–79.
- 534 12. Kessler A, Halitschke R, Baldwin IT. Silencing the jasmonate cascade: induced plant  
535 defenses and insect populations. *Science*. 2004;305:665–8.
- 536 13. Kallenbach M, Bonaventure G, Gilardoni PA, et al. *Empoasca* leafhoppers attack wild  
537 tobacco plants in a jasmonate-dependent manner and identify jasmonate mutants in  
538 natural populations. *Proc Natl Acad Sci USA*. 2012;109:E1548–57.
- 539 14. van Poecke RMP. *Arabidopsis*-insect interactions. *Arabidopsis Book*. 2007;5:e0107.
- 540 15. The 1001 Genomes Consortium. 1,135 genomes reveal the global pattern of  
541 polymorphism in *Arabidopsis thaliana*. *Cell*. 2016;166:481–91.
- 542 16. Handley R, Ekbom B, Ågren J. Variation in trichome density and resistance against a  
543 specialist insect herbivore in natural populations of *Arabidopsis thaliana*. *Ecol Entomol*.  
544 2005;30:284–92.
- 545 17. Mauricio R. Costs of resistance to natural enemies in field populations of the annual plant  
546 *Arabidopsis thaliana*. *Am Nat*. 1998;151:20–28.
- 547 18. Sato Y, Kudoh H. Herbivore-mediated interaction promotes the maintenance of trichome  
548 dimorphism through negative frequency-dependent selection. *Am Nat*. 2017;190:E67–77.
- 549 19. Falk KL, Kästner J, Bodenhausen N, et al. The role of glucosinolates and the jasmonic  
550 acid pathway in resistance of *Arabidopsis thaliana* against molluscan herbivores. *Mol*  
551 *Ecol*. 2014;23:1188–1203.
- 552 20. Kliebenstein D, Pedersen D, Barker B, Mitchell-Olds T. Comparative analysis of

- 553 quantitative trait loci controlling glucosinolates, myrosinase and insect resistance in  
554 *Arabidopsis thaliana*. *Genetics*. 2002;161:325–32.
- 555 21. Barker AM, Molotsane R, Müller C, et al. Chemosensory and behavioural responses of  
556 the turnip sawfly, *Athalia rosae*, to glucosinolates and isothiocyanates. *Chemoecology*.  
557 2006;16:209–18.
- 558 22. Reymond P, Bodenhausen N, Van Poecke RM, et al. A conserved transcript pattern in  
559 response to a specialist and a generalist herbivore. *Plant Cell*. 2004;16:3132–47.
- 560 23. Mewis I, Tokuhisa JG, Schultz JC, Appel HM, Ulrichs C, Gershenzon J. Gene expression  
561 and glucosinolate accumulation in *Arabidopsis thaliana* in response to generalist and  
562 specialist herbivores of different feeding guilds and the role of defense signaling  
563 pathways. *Phytochemistry*. 2006;67:2450–62.
- 564 24. Kempema LA, Cui X, Holzer FM, Walling LL. *Arabidopsis* transcriptome changes in  
565 response to phloem-feeding silverleaf whitefly nymphs: similarities and distinctions in  
566 responses to aphids. *Plant Physiol*. 2007;143:849–65.
- 567 25. Züst T, Joseph B, Shimizu KK, et al. Using knockout mutants to reveal the growth costs  
568 of defensive traits. *Proc R Soc Lond B*. 2011;278:2598–603
- 569 26. Shimizu KK, Kudoh H, Kobayashi MJ. Plant sexual reproduction during climate change:  
570 gene function in natura studied by ecological and evolutionary systems biology. *Ann Bot*.  
571 2011;108:777–87.
- 572 27. Nagano AJ, Sato Y, Mihara M, et al. Deciphering and prediction of transcriptome  
573 dynamics under fluctuating field conditions. *Cell*. 2012;151:1358–69.
- 574 28. Kudoh H. Molecular phenology in plants: in natura systems biology for the  
575 comprehensive understanding of seasonal responses under natural environments. *New*  
576 *Phytol*. 2016;210:399–412.



- 577 29. Symonds VV, Godoy AV, Alconada T, et al. Mapping quantitative trait loci in multiple  
578 populations of *Arabidopsis thaliana* identifies natural allelic variation for trichome  
579 density. *Genetics*. 2005;169:1649–58.
- 580 30. Bloomer RH, Juenger TE, Symonds VV. Natural variation in *GL1* and its effects on  
581 trichome density in *Arabidopsis thaliana*. *Mol Ecol*. 2012;21:3501–3515.
- 582 31. Atwell S, Huang YS, Vilhjálmsson BJ, et al. Genome-wide association study of 107  
583 phenotypes in *Arabidopsis thaliana* inbred lines. *Nature*. 2010;465:627–31.
- 584 32. Chan EKF, Rowe HC, Kliebenstein DJ. Understanding the evolution of defense  
585 metabolites in *Arabidopsis thaliana* using genome-wide association mapping. *Genetics*.  
586 2010;185:991–1007.
- 587 33. Roux F, Bergelson J. The genetics underlying natural variation in the biotic interactions of  
588 *Arabidopsis thaliana*: the challenges of linking evolutionary genetics and community  
589 ecology, *Curr Top Dev Biol*. 2016;119:111–56.
- 590 34. Hülskamp M. Plant trichomes: a model for cell differentiation. *Nat Rev Mol Cell Biol*.  
591 2004;5:471–80.
- 592 35. Ishida T, Kurata T, Okada K, Wada T. A genetic regulatory network in the development of  
593 trichomes and root hairs. *Annu Rev Plant Biol*. 2008;59:365–86.
- 594 36. Yoshida Y, Sano R, Wada T, et al. Jasmonic acid control of *GLABRA3* links inducible  
595 defense and trichome patterning in *Arabidopsis*. *Development*. 2009;136:1039–48.
- 596 37. Hauser MT, Harr B, Schlötterer C. Trichome distribution in *Arabidopsis thaliana* and its  
597 close relative *Arabidopsis lyrata*: molecular analysis of the candidate gene *GLABROUS1*.  
598 *Mol Biol Evol*. 2001;18:1754–63.
- 599 38. Shimizu KK. Ecology meets molecular genetics in *Arabidopsis*. *Popul Ecol*.  
600 2002;44:221–33.

- 601 39. Kawagoe T, Shimizu KK, Kakutani T, Kudoh H. Coexistence of trichome variation in a  
602 natural plant population: a combined study using ecological and candidate gene  
603 approaches. PLoS ONE. 2011;6:e22184.
- 604 40. Larkin JC, Walker JD, Bolognesi-Winfield AC, et al. Allele-specific interactions between  
605 *ttg* and *gll* during trichome development in *Arabidopsis thaliana*. Genetics.  
606 1999;151:1591–604.
- 607 41. Grebe M. The patterning of epidermal hairs in *Arabidopsis* - updated. Cur Opin Plant Biol.  
608 2012;15:31–7.
- 609 42. Wilczek AM, Roe JL, Knapp MC, et al. Effects of genetic perturbation on seasonal life  
610 history plasticity. Science. 2009;323:930–34.
- 611 43. Taylor MA, Cooper MD, Sellamuthu R, et al. Interacting effects of genetic variation for  
612 seed dormancy and flowering time on phenology, life history, and fitness of experimental  
613 *Arabidopsis thaliana* populations over multiple generations in the field. New Phytol.  
614 2017;216:291–302.
- 615 44. Thompson L. The spatiotemporal effects of nitrogen and litter on the population dynamics  
616 of *Arabidopsis thaliana*. J Ecol. 1994;82:63–88.
- 617 45. Chiang GC, Barua D, Dittmar E, et al. Pleiotropy in the wild: the dormancy gene *DOG1*  
618 exerts cascading control on life cycles. Evolution. 2013;67:883–893.
- 619 46. Bentsink L, Hanson J, Hanhart CJ, et al. Natural variation for seed dormancy in  
620 *Arabidopsis* is regulated by additive genetic and molecular pathways. Proc Natl Acad Sci  
621 USA. 2010;107:4264–4269.
- 622 47. Shindo, C., Aranzana, M. J., Lister, C., et al. Role of *FRIGIDA* and *FLOWERING*  
623 *LOCUS C* in determining variation in flowering time of *Arabidopsis*. Plant Physiol.  
624 2005;138:1163–1173.

- 625 48. Arany AM, de Jong TJ, van der Meijden E. Herbivory and abiotic factors affect  
626 population dynamics of *Arabidopsis thaliana* in a sand dune area. *Plant Biol.*  
627 2015;7:549-56.
- 628 49. Harvey JA, Witjes LMA, Benkirane M, Duyts H, Wagenaar R. Nutritional suitability and  
629 ecological relevance of *Arabidopsis thaliana* and *Brassica oleracea* as food plants for the  
630 cabbage butterfly, *Pieris rapae*. *Plant Ecol.* 2007;189:117–26.
- 631 50. Kerwin R, Feusier J, Corwin J, et al. Natural genetic variation in *Arabidopsis thaliana*  
632 defense metabolism genes modulates field fitness. *eLife.* 2015;4:e05604.
- 633 51. Heidel AJ, Clarke JD, Antonovics J, Dong X. Fitness costs of mutations affecting the  
634 systemic acquired resistance pathway in *Arabidopsis thaliana*. *Genetics.* 2004;168:2197–  
635 206.
- 636 52. Oppenheimer DG, Herman PL, Sivakumaran S, Esch J, Marks MD. A myb gene required  
637 for leaf trichome differentiation in *Arabidopsis* is expressed in stipules. *Cell.*  
638 1991;67:483–93.
- 639 53. Shimizu KK, Tsuchimatsu T. Evolution of selfing: recurrent patterns in molecular  
640 adaptation. *Ann Rev Ecol Evol Syst.* 2015;46:593–622.
- 641 54. Wentzell AM, Rowe HC, Hansen BG, Ticconi C, Halkier BA, Kliebenstein DJ. Linking  
642 metabolic QTLs with network and cis-eQTLs controlling biosynthetic pathways. *PLoS*  
643 *Genet.* 2007;3:e162.
- 644 55. Joseph B, Corwin JA, Züst T, et al. Hierarchical nuclear and cytoplasmic genetic  
645 architectures for plant growth and defense within *Arabidopsis*. *Plant Cell.* 2013;25:1929–  
646 45.
- 647 56. Brachi B, Meyer CG, Villoutreix R, et al. Coselected genes determine adaptive variation  
648 in herbivore resistance throughout the native range of *Arabidopsis thaliana*. *Proc Natl*

- 649 Acad Sci USA. 2015;112:4032–7.
- 650 57. Okamura Y, Sawada Y, Hirai MY, Murakami M. Effects of different secondary metabolite  
651 profiles in plant defense syndromes on specialist and generalist herbivores. Entomol Sci.  
652 2016;19:97–103.
- 653 58. Ruppel RF. Cumulative insect-days as an index of crop protection. J Econ Entomol.  
654 1983;76:375–77.
- 655 59. R Core Team. R: A language and environment for statistical computing. R Foundation for  
656 Statistical Computing, Vienna, Austria. URL <http://www.R-project.org/>; 2015.
- 657 60. Oksanen J, Blanchet FG, Kindt, R, et al. vegan: community ecology package. R package  
658 version 2.3-4. <http://CRAN.R-project.org/package=vegan>; 2015
- 659 61. Pinheiro J, Bates D, DebRoy S, et al. nlme: linear and nonlinear mixed effects models. R  
660 package version 3.1-126. URL: <http://CRAN.R-project.org/package=nlme>; 2016.
- 661 62. Patterson HD, Thompson R. Maximum likelihood estimation of variances. Biometrika.  
662 1971;58:545–54.
- 663 63. Falconer DS. Introduction to quantitative genetics. 3rd ed. Pearson Education India; 1989.
- 664 64. Benjamini Y, Hochberg Y. Controlling the false discovery rate: a practical and powerful  
665 approach to multiple testing. J Royal Stat Soc B. 1995;57:289–300.
- 666 65. Davila Olivas NH, Frago E, Thoen MPM, et al. Natural variation in life history strategy  
667 of *Arabidopsis thaliana* determines stress responses to drought and insects of different  
668 feeding guilds. Mol Ecol. 2017;26:2959–77.
- 669 66. Davila Olivas NH, Kruijer W, Gort G, et al. Genome-wide association analysis reveals  
670 distinct genetic architectures for single and combined stress responses in *Arabidopsis*  
671 *thaliana*. New Phytol. 2017;213:838–51.
- 672 67. Bidart-Bouzat MG, Kliebenstein DJ. Differential levels of insect herbivory in the field

- 673 associated with genotypic variation in glucosinolates in *Arabidopsis thaliana*. J Chem  
674 Ecol. 2008;34:1026–37.
- 675 68. Feeny P. Plant apparency and chemical defense. In: Wallace JW, Mansell RL, editors.  
676 Biochemical interaction between plants and insects. Boston, MA: Springer; 1976. p. 1–  
677 40.
- 678 69. Carmona D, Lajeunesse MJ, Johnson MTJ. Plant traits that predict resistance to  
679 herbivores. Funct Ecol. 2011;25:358–67.
- 680 70. Schlinkert H, Westphal C, Clough Y, et al. Feeding damage to plants increases with plant  
681 size across 21 Brassicaceae species. Oecologia. 2015;179:455–66.
- 682 71. Travers-Martin N, Müller C. Matching plant defence syndromes with performance and  
683 preference of a specialist herbivore. Funct Ecol. 2008;22:1033–43.
- 684 72. Agerbirk N, Ørgaard M, Nielsen JK. Glucosinolates, flea beetle resistance, and leaf  
685 pubescence as taxonomic characters in the genus *Barbarea* (Brassicaceae).  
686 Phytochemistry. 2003;63:69–80.
- 687 73. Soroka JJ, Holowachuk JM, Gruber MY, Grenkow LF. Feeding by flea beetles  
688 (Coleoptera: Chrysomelidae; *Phyllotreta* spp.) is decreased on canola (*Brassica napus*)  
689 seedlings with increased trichome density. J Econ Entomol. 2011;104:125–36.
- 690 74. Züst T, Heichinger C, Grossniklaus U, et al. Natural enemies drive geographic variation  
691 in plant defenses. Science. 2012;338:116–9.
- 692 75. Schuman MC, Heinzl N, Gaquerel E, et al. Polymorphism in jasmonate signaling  
693 partially accounts for the variety of volatiles produced by *Nicotiana attenuata* plants in a  
694 native population. New Phytol. 2009;183:1134–48.
- 695 76. Li R, Wang M, Wang Y, et al. Flower-specific jasmonate signaling regulates constitutive  
696 floral defenses in wild tobacco. Proc Natl Acad Sci USA. 2017;114:E7205–14.

- 697 77. Müller C. Interactions between glucosinolate- and myrosinase-containing plants and the  
698 sawfly *Athalia rosae*. *Phytochem Rev.* 2009;8:121–34.
- 699 78. Beran F, Pauchet Y, Kunert G, et al. *Phyllotreta striolata* flea beetles use host plant  
700 defense compounds to create their own glucosinolate-myrosinase system. *Proc Natl Acad*  
701 *Sci USA.* 2014;111:7349–54.
- 702 79. Lankau R, Strauss S. Community complexity drives patterns of natural selection on a  
703 chemical defense of *Brassica nigra*. *Am Nat.* 2008;171:150–161.
- 704 80. Lankau RA, Kliebenstein DJ. Competition, herbivory and genetics interact to determine  
705 the accumulation and fitness consequences of a defence metabolite. *J Ecol.* 2009;97:78–  
706 88.
- 707 81. Li F, Kitashiba H, Nishio T. Association of sequence variation in *Brassica GLABRA1*  
708 orthologs with leaf hairiness. *Mol Breeding.* 2011;28:577–584.

709  
710

711

712 **Table 1.** *Arabidopsis thaliana* accessions used in this study.

| Accession           | ID                  | Locality       | Trichome (no./cm <sup>2</sup> ) |
|---------------------|---------------------|----------------|---------------------------------|
| Bay-0               | N22633              | Germany        | 26.3                            |
| Br-0                | N22628              | Czech Republic | 0                               |
| C24                 | N22620              | Portugal       | 2.5                             |
| Col-0               | N22625              | USA            | 32.5                            |
| Col( <i>gll-2</i> ) | CS3126 <sup>†</sup> | USA            | 4.0 <sup>‡</sup>                |
| Cvi-0               | N22614              | Cape Verde     | 104.3                           |
| Est-1               | N22629              | Russia         | 39.3                            |
| Kas-2               | CS6751              | India          | 9                               |
| Kin-0               | N22654              | USA            | 14                              |
| Ler-1               | N22618              | Germany        | 14.3                            |
| Ler( <i>gll-1</i> ) | CS64 <sup>*</sup>   | Germany        | 0                               |
| Mr-0                | N22640              | Italy          | 23.3                            |
| Ms-0                | N22655              | Russia         | 43.6 <sup>‡</sup>               |
| Nd-1                | N22619              | Switzerland    | 47                              |
| Se-0                | N22646              | Spain          | 30.5                            |
| Shahdara            | N22652              | Tajikistan     | 55.5                            |
| Tsu-1               | N22641              | Japan          | 11.3                            |
| Van-0               | N22627              | Canada         | 20.8                            |
| Ws-2                | N22659              | Russia         | 33.3                            |

713 The table shows the stock ID, locality, and trichome density (no./cm<sup>2</sup>: Atwell et al. [31]).

714 <sup>\*</sup>Obtained through Kiyotaka Okada Laboratory of Kyoto University, Japan.

715 <sup>†</sup>Obtained through Dr. M. Ohto.

716 <sup>‡</sup>Estimated from the relative trichome density to Col-0 accession presented in previous  
717 publications (Hauser et al. [37] and Yoshida et al. [36] for Ms-0 and *gll-2*, respectively)

718 **Table 2.** Insect species observed on field-grown *Arabidopsis thaliana*.

| Common name                                     | Scientific name                   | Feeding habit   | Host range | Abundance † |      |
|-------------------------------------------------|-----------------------------------|-----------------|------------|-------------|------|
|                                                 |                                   |                 |            | Zurich      | Otsu |
| Cabbage looper                                  | <i>Trichoplusia ni</i>            | Leaf chewer     | Generalist | 0           | -    |
| Diamond back moth                               | <i>Plutella xylostella</i>        | Leaf chewer     | Specialist | ++          | ++   |
| Garden springtail*                              | <i>Bourletiella hortensis</i>     | Leaf chewer     | Generalist | -           | +    |
| Piggyback grasshopper                           | <i>Atractomorpha lata</i>         | Leaf chewer     | Generalist | -           | -    |
| Small cabbage white butterfly                   | <i>Pieris rapae</i>               | Leaf chewer     | Specialist | +           | +    |
| Striped flea beetle                             | <i>Phyllotreta striolata</i>      | Leaf chewer     | Specialist | ++          | -    |
| Turnip flea beetle                              | <i>Phyllotreta atra</i>           | Leaf chewer     | Specialist | +++         | 0    |
| (Leaf holes made by flea beetles)               | <i>Phyllotreta</i> spp.           | Leaf chewer     | Specialist | +++         | -    |
| Turnip sawfly                                   | <i>Athalia rosae</i>              | Leaf chewer     | Specialist | 0           | +++  |
| (Dwelling traces)                               | NA                                | Internal feeder | Generalist | -           | 0    |
| Green peach aphid                               | <i>Myzus persicae</i>             | Internal feeder | Generalist | +           | +    |
| Mustard aphids                                  | <i>Lipaphis erysimi</i>           | Internal feeder | Specialist | +++         | +    |
| Onion thrip                                     | <i>Thrips tabaci</i>              | Internal feeder | Generalist | +           | +    |
| Western flower thrip                            | <i>Frankliniella occidentalis</i> | Internal feeder | Generalist | ++          | ++   |
| (Parasitoid wasp indicated by mummified aphids) | NA                                | Carnivore       |            | +           | +    |
| Seven-spot ladybird                             | <i>Coccinella septempunctata</i>  | Carnivore       |            | 0           | -    |

719 Detailed abundance in the Zurich and Otsu sites is provided in the supplementary material

720 (Figure S2).

721 \*Only this species is a non-insect arthropod.

722 †Abundance level: +++ (abundant), ++, +, - (rare), and 0 (not found).

723 NA indicates not applicable.

724

725



726 **Table 3.** Likelihood ratio tests for estimating broad-sense heritability  $H^2$ .

| Response                      | Zurich      |              |                  | Otsu        |              |                  |
|-------------------------------|-------------|--------------|------------------|-------------|--------------|------------------|
|                               | $H^2$       | LR- $\chi^2$ | $P_{\text{fdr}}$ | $H^2$       | LR- $\chi^2$ | $P_{\text{fdr}}$ |
| Turnip sawfly                 | ---         | ---          | ---              | <b>0.33</b> | <b>41.0</b>  | <b>2.0.E-09</b>  |
| Leaf holes                    | <b>0.40</b> | <b>55.1</b>  | <b>1.5.E-12</b>  | ---         | ---          | ---              |
| Striped flea beetle           | <b>0.16</b> | <b>12.6</b>  | <b>1.2.E-03</b>  | ---         | ---          | ---              |
| Turnip flea beetle            | 0.01        | 0.16         | 0.75             | ---         | ---          | ---              |
| Diamond back moth             | 1.6E-09     | -6.5E-08     | 1                | 0.07        | 2.87         | 0.13             |
| Small cabbage white butterfly | ---         | ---          | ---              | 0.05        | 1.92         | 0.22             |
| Green peach aphid             | ---         | ---          | ---              | 0.03        | 0.55         | 0.50             |
| Mustard aphid                 | 0.04        | 1.30         | 0.32             | 0.03        | 0.48         | 0.50             |
| Western flower thrip          | <b>0.32</b> | <b>38.8</b>  | <b>3.1.E-09</b>  | 0.03        | 0.46         | 0.50             |
| Leaf chewer                   | <b>0.14</b> | <b>10.4</b>  | <b>0.003</b>     | <b>0.28</b> | <b>31.3</b>  | <b>9.4.E-08</b>  |
| Internal feeder               | 0.04        | 1.22         | 0.32             | <b>0.14</b> | <b>9.7</b>   | <b>0.003</b>     |
| Specialist                    | <b>0.11</b> | <b>6.32</b>  | <b>0.02</b>      | <b>0.25</b> | <b>25.8</b>  | <b>1.0.E-06</b>  |
| Generalist                    | <b>0.17</b> | <b>13.2</b>  | <b>0.001</b>     | <b>0.12</b> | <b>7.5</b>   | <b>0.01</b>      |
| Species richness              | <b>0.11</b> | <b>6.82</b>  | <b>0.02</b>      | <b>0.26</b> | <b>27.3</b>  | <b>5.8.E-07</b>  |
| Shannon diversity             | <b>0.11</b> | <b>6.10</b>  | <b>0.02</b>      | <b>0.17</b> | <b>13.4</b>  | <b>0.001</b>     |
| Total abundance               | <b>0.10</b> | <b>5.97</b>  | <b>0.02</b>      | <b>0.29</b> | <b>33.0</b>  | <b>5.9.E-08</b>  |

727 Likelihood ratio, LR- $\chi^2$ , was tested by comparing the models with and without a random  
728 effect of the accession ID.  $P$ -values were based on a  $\chi^2$  distribution with one degree of  
729 freedom and corrected by false discovery rate, FDR [64]. Bold values indicate significant  $H^2$   
730 at  $P_{\text{fdr}} < 0.05$ . Bars indicate no information available due to low abundance.

731

732

733

734

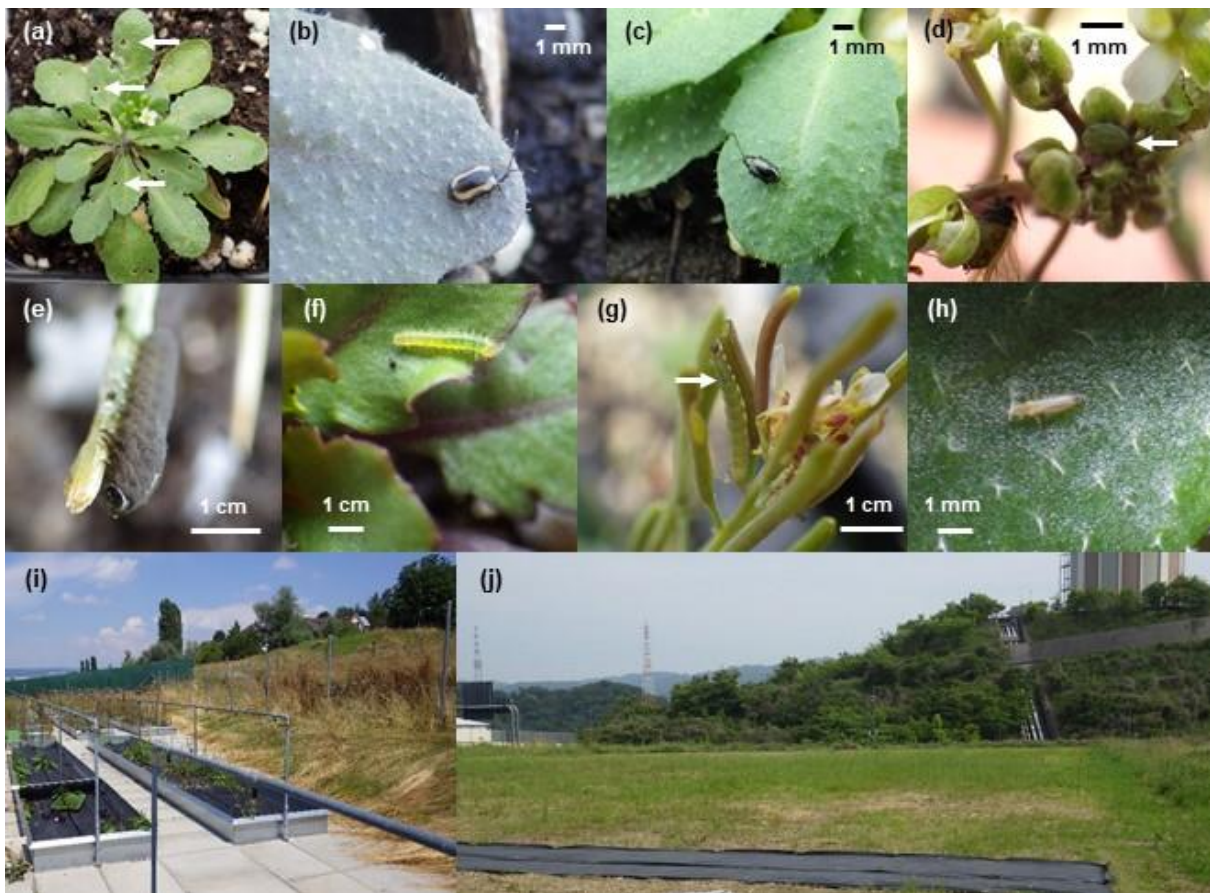

735 **Figure 1.** Photographs of plants and insects. **(a)** Leaf holes made by flea beetles (arrows), **(b)**  
736 a striped flea beetle *Phyllotreta striolata*, **(c)** a turnip flea beetle *Phyllotreta atra*, **(d)** mustard  
737 aphids *Lipaphis erysimi*, **(e)** a larva of the turnip sawfly *Athalia rosae*, **(f)** a newly hatched  
738 larva of the small cabbage white butterfly *Pieris rapae* **(g)** a larva of the diamond back moth  
739 *Plutella xylostella*, **(h)** a western flower thrips *Frankliniella occidentalis*, **(i)** the field site in  
740 Zurich, Switzerland, and **(j)** the field site in Otsu, Japan.

741

742

743

744

745

746

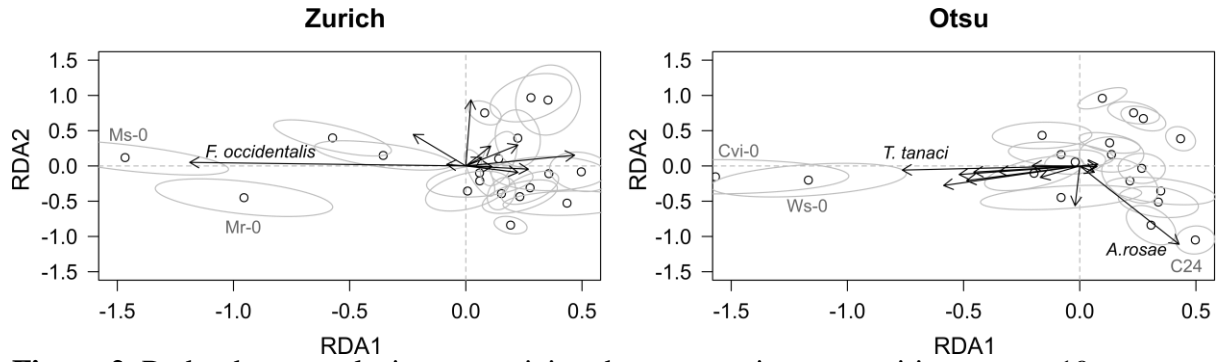

747

748 **Figure 2.** Redundancy analysis summarizing the community composition among 19

749 accessions of *A. thaliana* in Zurich, Switzerland and Otsu, Japan. White and grey circles

750 indicate the accession mean and its standard error projected on the first and second RDA

751 dimension. Arrows represent the contributions of each species. Permutation tests confirmed

752 significant variation in the community composition among plant accessions and study sites

753 (see the Results section).

754

755

756

757

758

759

760

761

762

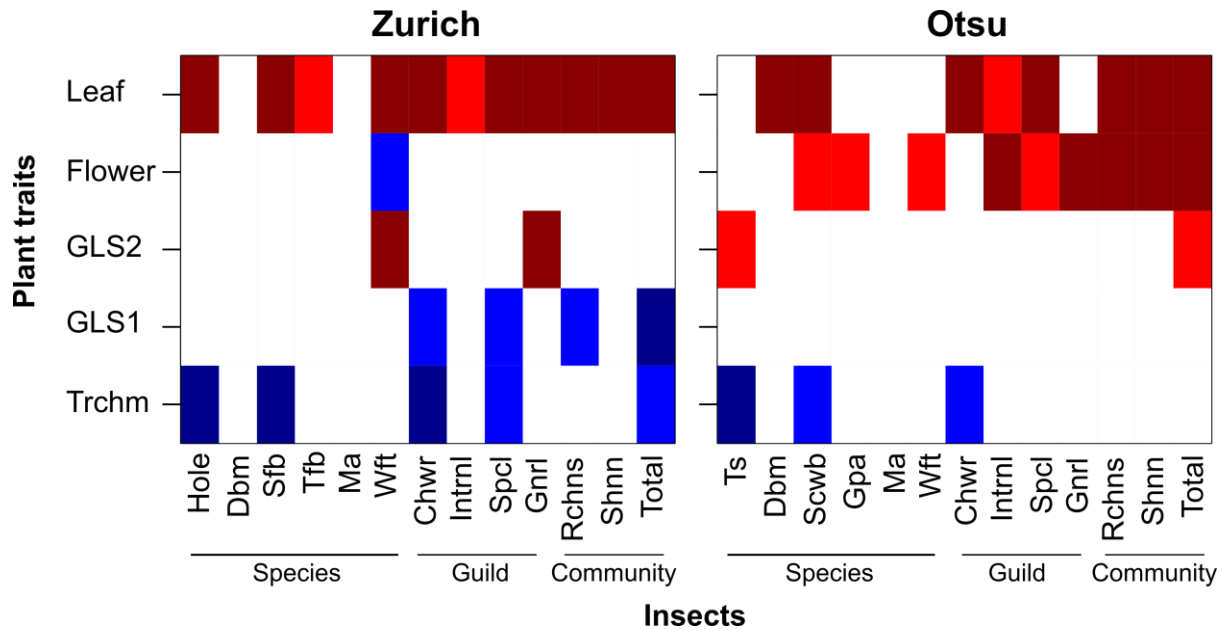

763

764 **Figure 3.** A heat map showing FDR-corrected p-values ( $P_{\text{fdr}}$ ) for the effects of plant traits on  
765 insect species, guild, and community indices among 17 natural accessions in Zurich,  
766 Switzerland and Otsu, Japan. Shown are the effects of trichome density (Trchm), PC1 and  
767 PC2 of aliphatic glucosinolates (GLS1 and GLS2), presence of flowering stems (Flower), and  
768 initial leaf length (Leaf) on the diamond back moth (Dbm), striped flea beetle (Sfb), turnip  
769 flea beetle (Tfb), mustard aphid (Ma), western flower thrip (Wft), turnip sawfly (Ts), small  
770 cabbage white butterfly (Scw), green peach aphid (Gpa), leaf chewers (Chwr), internal  
771 feeders (Intrnl), specialists (Spcl), generalists (Gnrl), species richness (Rchns), Shannon  
772 diversity (Shnn), and total abundance (Total). Colors represent the sign and significance of  
773 trait effects: ■(dark blue), - coef. with  $P_{\text{fdr}} < 0.01$ ; ■(blue), - coef. with  $P_{\text{fdr}} < 0.05$ ; ■(dark  
774 red), + coef. with  $P_{\text{fdr}} < 0.01$ ; ■(red), + coef. with  $P_{\text{fdr}} < 0.05$ ; □(white), not significant at  $P_{\text{fdr}}$   
775  $> 0.05$ .

776

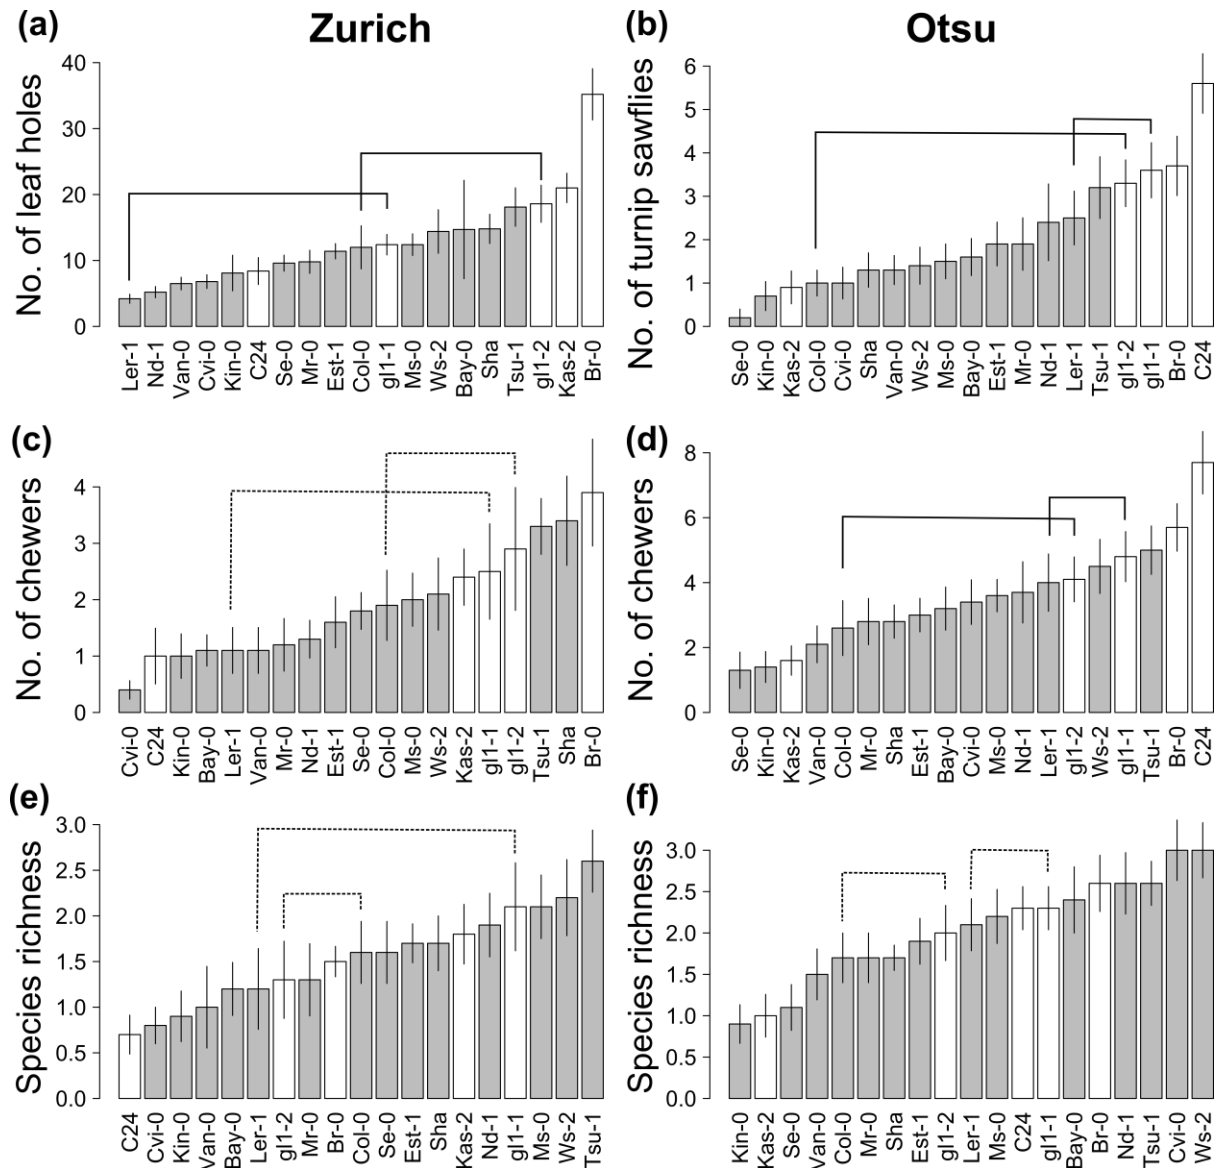

777

778 **Figure 4.** Variation in insect species, guild, and community on 19 *A. thaliana* accessions  
 779 (mean  $\pm$  SE) in Zurich, Switzerland (left panels) and Otsu, Japan (right panels). Given the  
 780 significant effects of trichomes on flea beetles *P. striolata* and sawflies *A. rosae* (Fig. 3),  
 781 these panels show herbivory, guild, and community indices comprising the flea beetles and  
 782 sawflies. White bars of plant accessions represent the sparse density of less than 10 leaf  
 783 trichomes/cm<sup>2</sup>. Connected lines highlight pairs between a glabrous mutant and its parental  
 784 accession, where solid and dashed lines indicate significant and non-significant differences  
 785 between the mutants and parental accessions at  $P_{\text{fdr}} < 0.05$ .

786 **Supporting information**

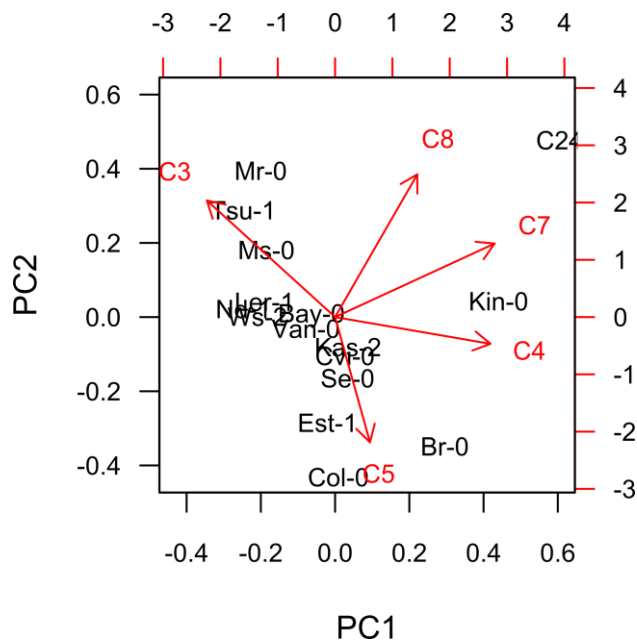

787

788 **Figure S1.** The first and second principal component (PC1 and PC2) summarizing the total  
789 amount (nmol/mg flesh weight) of C3-, C4-, C5-, C7-, and C8-Aliphatic glucosinolates for 17  
790 accessions of *A. thaliana* (compiled from Chan et al. [34]). Arrows indicate contributions of  
791 each glucosinolate to PC1 and PC2.

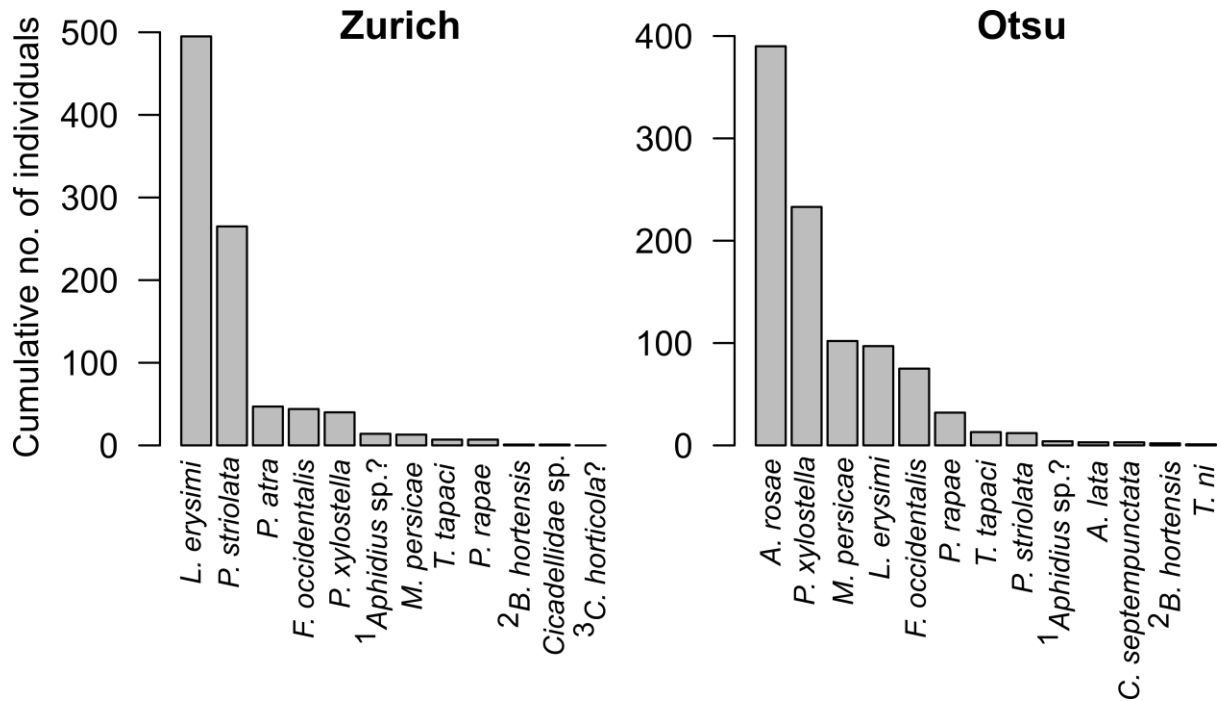

792 **Figure S2.** Cumulative number of each insect species in Zurich, Switzerland (left chart) and  
 793 Otsu, Japan (right chart) throughout the experiments. See Table 2 for the name of the  
 794 arthropod species. Notes: <sup>1</sup>Total number of parasitoid wasps and mummified aphids; <sup>2</sup>This  
 795 species is a non-insect arthropod; <sup>3</sup>Only a dwelling trace was observed.

797

798

799

800

801

802 **Table S1.** Effects of trichome density, the first and second principal component (PC1 and PC2) of aliphatic glucosinolates (GLSs),  
803 presence of flowering stem, and initial plant size on insect abundance and community composition among 17 natural accessions of  
804 *Arabidopsis thaliana*.

| Zurich              |                            |              |             |              |                          | Otsu                          |                            |              |             |              |                          |
|---------------------|----------------------------|--------------|-------------|--------------|--------------------------|-------------------------------|----------------------------|--------------|-------------|--------------|--------------------------|
| Response            | Explanatory                | Coef.        | SE          | <i>t</i>     | <i>P</i> <sub>fidr</sub> | Response                      | Explanatory                | Coef.        | SE          | <i>t</i>     | <i>P</i> <sub>fidr</sub> |
| Leaf holes          | <b>Trichome</b>            | <b>-0.53</b> | <b>0.10</b> | <b>-5.52</b> | <b>1.7.E-06</b>          | Turnip sawfly                 | <b>Trichome</b>            | <b>-0.49</b> | <b>0.10</b> | <b>-4.72</b> | <b>0.00006</b>           |
|                     | GLS_PC1                    | -0.15        | 0.08        | -1.76        | 0.11                     |                               | GLS_PC1                    | -0.08        | 0.09        | -0.86        | 0.58                     |
|                     | GLS_PC2                    | -0.16        | 0.07        | -2.44        | 0.06                     |                               | <b>GLS_PC2</b>             | <b>0.22</b>  | <b>0.07</b> | <b>2.97</b>  | <b>0.04</b>              |
|                     | Flowering                  | -0.28        | 0.15        | -1.89        | 0.24                     |                               | Flowering                  | 0.24         | 0.16        | 1.53         | 0.15                     |
|                     | <b>Initial leaf length</b> | <b>0.45</b>  | <b>0.08</b> | <b>5.98</b>  | <b>1.9.E-07</b>          |                               | Initial leaf length        | 0.10         | 0.07        | 1.41         | 0.19                     |
| Diamond back moth   | Trichome                   | -0.01        | 0.11        | -0.14        | 0.89                     | Diamond back moth             | Trichome                   | 0.11         | 0.11        | 0.97         | 0.47                     |
|                     | GLS_PC1                    | -0.20        | 0.09        | -2.12        | 0.06                     |                               | GLS_PC1                    | 0.03         | 0.10        | 0.28         | 0.85                     |
|                     | GLS_PC2                    | 0.00         | 0.07        | 0.05         | 0.99                     |                               | GLS_PC2                    | 0.06         | 0.08        | 0.78         | 0.71                     |
|                     | Flowering                  | 0.21         | 0.17        | 1.24         | 0.45                     |                               | Flowering                  | 0.10         | 0.17        | 0.58         | 0.56                     |
|                     | Initial leaf length        | 0.10         | 0.08        | 1.14         | 0.28                     |                               | <b>Initial leaf length</b> | <b>0.34</b>  | <b>0.08</b> | <b>4.25</b>  | <b>0.00045</b>           |
| Striped flea beetle | <b>Trichome</b>            | <b>-0.45</b> | <b>0.09</b> | <b>-5.10</b> | <b>6.0.E-06</b>          | Small cabbage white butterfly | <b>Trichome</b>            | <b>-0.30</b> | <b>0.10</b> | <b>-2.99</b> | <b>0.01</b>              |
|                     | GLS_PC1                    | -0.17        | 0.08        | -2.15        | 0.06                     |                               | GLS_PC1                    | 0.09         | 0.08        | 1.08         | 0.57                     |
|                     | GLS_PC2                    | -0.13        | 0.06        | -2.12        | 0.11                     |                               | GLS_PC2                    | -0.04        | 0.07        | -0.54        | 0.71                     |



|                      |                            |              |             |              |                 |                      |                            |              |             |              |             |
|----------------------|----------------------------|--------------|-------------|--------------|-----------------|----------------------|----------------------------|--------------|-------------|--------------|-------------|
|                      | Flowering                  | -0.06        | 0.14        | -0.43        | 0.67            |                      | <b>Flowering</b>           | <b>0.43</b>  | <b>0.15</b> | <b>2.84</b>  | <b>0.01</b> |
|                      | <b>Initial leaf length</b> | <b>0.37</b>  | <b>0.07</b> | <b>5.18</b>  | <b>2.7.E-06</b> |                      | <b>Initial leaf length</b> | <b>0.22</b>  | <b>0.07</b> | <b>3.06</b>  | <b>0.01</b> |
| Turnip flea beetle   | Trichome                   | -0.08        | 0.11        | -0.76        | 0.68            | Green peach aphid    | Trichome                   | 0.03         | 0.12        | 0.22         | 0.82        |
|                      | GLS_PC1                    | -0.01        | 0.10        | -0.08        | 0.93            |                      | GLS_PC1                    | -0.07        | 0.10        | -0.69        | 0.66        |
|                      | GLS_PC2                    | 0.00         | 0.08        | 0.01         | 0.99            |                      | GLS_PC2                    | 0.05         | 0.08        | 0.61         | 0.71        |
|                      | Flowering                  | -0.40        | 0.17        | -2.33        | 0.13            |                      | <b>Flowering</b>           | <b>0.50</b>  | <b>0.18</b> | <b>2.84</b>  | <b>0.01</b> |
|                      | <b>Initial leaf length</b> | <b>0.23</b>  | <b>0.09</b> | <b>2.63</b>  | <b>0.01</b>     |                      | Initial leaf length        | 0.16         | 0.08        | 1.93         | 0.07        |
| Mustard aphid        | Trichome                   | -0.02        | 0.11        | -0.20        | 0.89            | Mustard aphid        | Trichome                   | 0.25         | 0.12        | 2.08         | 0.09        |
|                      | GLS_PC1                    | -0.19        | 0.10        | -1.93        | 0.08            |                      | GLS_PC1                    | 0.15         | 0.10        | 1.42         | 0.47        |
|                      | GLS_PC2                    | 0.05         | 0.08        | 0.58         | 0.75            |                      | GLS_PC2                    | -0.02        | 0.09        | -0.22        | 0.85        |
|                      | Flowering                  | 0.22         | 0.18        | 1.22         | 0.45            |                      | Flowering                  | 0.27         | 0.18        | 1.44         | 0.17        |
|                      | Initial leaf length        | 0.04         | 0.09        | 0.41         | 0.68            |                      | Initial leaf length        | 0.10         | 0.09        | 1.14         | 0.28        |
| Western flower thrip | Trichome                   | 0.12         | 0.11        | 1.10         | 0.54            | Western flower thrip | Trichome                   | -0.10        | 0.11        | -0.93        | 0.47        |
|                      | GLS_PC1                    | -0.07        | 0.10        | -0.67        | 0.55            |                      | GLS_PC1                    | -0.21        | 0.10        | -2.21        | 0.34        |
|                      | <b>GLS_PC2</b>             | <b>0.30</b>  | <b>0.08</b> | <b>3.86</b>  | <b>0.002</b>    |                      | GLS_PC2                    | 0.09         | 0.08        | 1.14         | 0.71        |
|                      | Flowering                  | -0.51        | 0.18        | -2.92        | 0.05            |                      | <b>Flowering</b>           | <b>0.39</b>  | <b>0.17</b> | <b>2.31</b>  | <b>0.04</b> |
|                      | <b>Initial Leaf Length</b> | <b>0.37</b>  | <b>0.09</b> | <b>4.23</b>  | <b>7.0.E-05</b> |                      | Initial leaf length        | 0.04         | 0.08        | 0.56         | 0.58        |
| Leaf chewer          | <b>Trichome</b>            | <b>-0.42</b> | <b>0.09</b> | <b>-4.62</b> | <b>3.3.E-05</b> | Leaf chewer          | <b>Trichome</b>            | <b>-0.35</b> | <b>0.11</b> | <b>-3.18</b> | <b>0.01</b> |
|                      | <b>GLS_PC1</b>             | <b>-0.21</b> | <b>0.08</b> | <b>-2.60</b> | <b>0.04</b>     |                      | GLS_PC1                    | -0.05        | 0.09        | -0.57        | 0.68        |

|                  |                            |              |             |              |                 |                  |                            |             |             |             |               |
|------------------|----------------------------|--------------|-------------|--------------|-----------------|------------------|----------------------------|-------------|-------------|-------------|---------------|
|                  | GLS_PC2                    | -0.10        | 0.06        | -1.55        | 0.25            |                  | GLS_PC2                    | 0.19        | 0.08        | 2.48        | 0.08          |
|                  | Flowering                  | -0.14        | 0.14        | -0.99        | 0.48            |                  | Flowering                  | 0.31        | 0.17        | 1.84        | 0.09          |
|                  | <b>Initial Leaf Length</b> | <b>0.41</b>  | <b>0.07</b> | <b>5.67</b>  | <b>4.2.E-07</b> |                  | <b>Initial leaf length</b> | <b>0.31</b> | <b>0.08</b> | <b>3.94</b> | <b>0.0005</b> |
| Internal feeder  | Trichome                   | 0.04         | 0.11        | 0.32         | 0.89            | Internal feeder  | Trichome                   | 0.10        | 0.11        | 0.93        | 0.47          |
|                  | GLS_PC1                    | -0.21        | 0.10        | -2.18        | 0.06            |                  | GLS_PC1                    | -0.09       | 0.09        | -0.94       | 0.58          |
|                  | GLS_PC2                    | 0.15         | 0.08        | 1.93         | 0.13            |                  | GLS_PC2                    | 0.04        | 0.08        | 0.54        | 0.71          |
|                  | Flowering                  | 0.13         | 0.17        | 0.78         | 0.58            |                  | <b>Flowering</b>           | <b>0.70</b> | <b>0.17</b> | <b>4.10</b> | <b>0.0003</b> |
|                  | <b>Initial leaf length</b> | <b>0.21</b>  | <b>0.09</b> | <b>2.41</b>  | <b>0.02</b>     |                  | <b>Initial leaf length</b> | <b>0.18</b> | <b>0.08</b> | <b>2.21</b> | <b>0.05</b>   |
| Specialist       | <b>Trichome</b>            | <b>-0.29</b> | <b>0.11</b> | <b>-2.75</b> | <b>0.02</b>     | Specialist       | Trichome                   | -0.25       | 0.11        | -2.21       | 0.09          |
|                  | <b>GLS_PC1</b>             | <b>-0.28</b> | <b>0.09</b> | <b>-2.98</b> | <b>0.04</b>     |                  | GLS_PC1                    | 0.01        | 0.10        | 0.10        | 0.92          |
|                  | GLS_PC2                    | -0.05        | 0.07        | -0.71        | 0.75            |                  | GLS_PC2                    | 0.17        | 0.08        | 2.10        | 0.15          |
|                  | Flowering                  | 0.07         | 0.17        | 0.43         | 0.67            |                  | <b>Flowering</b>           | <b>0.39</b> | <b>0.17</b> | <b>2.29</b> | <b>0.04</b>   |
|                  | <b>Initial leaf length</b> | <b>0.29</b>  | <b>0.08</b> | <b>3.46</b>  | <b>0.001</b>    |                  | <b>Initial leaf length</b> | <b>0.32</b> | <b>0.08</b> | <b>3.98</b> | <b>0.0005</b> |
| Generalist       | Trichome                   | 0.09         | 0.11        | 0.78         | 0.68            | Generalist       | Trichome                   | 0.03        | 0.11        | 0.26        | 0.82          |
|                  | GLS_PC1                    | -0.13        | 0.10        | -1.32        | 0.23            |                  | GLS_PC1                    | -0.18       | 0.09        | -1.92       | 0.34          |
|                  | <b>GLS_PC2</b>             | <b>0.27</b>  | <b>0.08</b> | <b>3.53</b>  | <b>0.003</b>    |                  | GLS_PC2                    | 0.06        | 0.08        | 0.81        | 0.71          |
|                  | Flowering                  | -0.18        | 0.17        | -1.04        | 0.48            |                  | <b>Flowering</b>           | <b>0.65</b> | <b>0.16</b> | <b>3.93</b> | <b>0.0004</b> |
|                  | <b>Initial leaf length</b> | <b>0.40</b>  | <b>0.09</b> | <b>4.59</b>  | <b>2.2.E-05</b> |                  | Initial leaf length        | 0.16        | 0.08        | 2.09        | 0.06          |
| Species richness | Trichome                   | -0.14        | 0.10        | -1.32        | 0.45            | Species richness | Trichome                   | -0.14       | 0.11        | -1.34       | 0.36          |

|                   |                            |              |             |              |                 |                   |                            |             |             |             |                |
|-------------------|----------------------------|--------------|-------------|--------------|-----------------|-------------------|----------------------------|-------------|-------------|-------------|----------------|
|                   | <b>GLS_PC1</b>             | <b>-0.24</b> | <b>0.09</b> | <b>-2.71</b> | <b>0.04</b>     |                   | GLS_PC1                    | -0.15       | 0.09        | -1.69       | 0.37           |
|                   | GLS_PC2                    | -0.04        | 0.07        | -0.60        | 0.75            |                   | GLS_PC2                    | 0.07        | 0.08        | 0.88        | 0.71           |
|                   | Flowering                  | -0.09        | 0.16        | -0.53        | 0.67            |                   | <b>Flowering</b>           | <b>0.68</b> | <b>0.16</b> | <b>4.22</b> | <b>0.0003</b>  |
|                   | <b>Initial leaf length</b> | <b>0.39</b>  | <b>0.08</b> | <b>4.82</b>  | <b>1.0.E-05</b> |                   | <b>Initial leaf length</b> | <b>0.29</b> | <b>0.08</b> | <b>3.84</b> | <b>0.0005</b>  |
| Shannon diversity | Trichome                   | -0.06        | 0.10        | -0.61        | 0.72            | Shannon diversity | Trichome                   | -0.09       | 0.10        | -0.85       | 0.48           |
|                   | GLS_PC1                    | -0.22        | 0.09        | -2.40        | 0.05            |                   | GLS_PC1                    | -0.11       | 0.09        | -1.25       | 0.51           |
|                   | GLS_PC2                    | 0.01         | 0.07        | 0.13         | 0.99            |                   | GLS_PC2                    | 0.01        | 0.07        | 0.19        | 0.85           |
|                   | Flowering                  | -0.21        | 0.16        | -1.26        | 0.45            |                   | <b>Flowering</b>           | <b>0.68</b> | <b>0.16</b> | <b>4.35</b> | <b>0.0003</b>  |
|                   | <b>Initial leaf length</b> | <b>0.35</b>  | <b>0.08</b> | <b>4.24</b>  | <b>7.0.E-05</b> |                   | <b>Initial leaf length</b> | <b>0.23</b> | <b>0.07</b> | <b>3.09</b> | <b>0.005</b>   |
| Total abundance   | <b>Trichome</b>            | <b>-0.25</b> | <b>0.10</b> | <b>-2.43</b> | <b>0.02</b>     | Total abundance   | Trichome                   | -0.19       | 0.11        | -1.72       | 0.09           |
|                   | <b>GLS_PC1</b>             | <b>-0.28</b> | <b>0.09</b> | <b>-3.11</b> | <b>0.002</b>    |                   | GLS_PC1                    | -0.05       | 0.09        | -0.54       | 0.59           |
|                   | GLS_PC2                    | 0.00         | 0.07        | -0.04        | 0.97            |                   | <b>GLS_PC2</b>             | <b>0.20</b> | <b>0.08</b> | <b>2.58</b> | <b>0.01</b>    |
|                   | Flowering                  | 0.04         | 0.16        | 0.24         | 0.81            |                   | <b>Flowering</b>           | <b>0.59</b> | <b>0.17</b> | <b>3.55</b> | <b>0.001</b>   |
|                   | <b>Initial leaf length</b> | <b>0.36</b>  | <b>0.08</b> | <b>4.37</b>  | <b>2.3.E-05</b> |                   | <b>Initial leaf length</b> | <b>0.34</b> | <b>0.08</b> | <b>4.39</b> | <b>0.00002</b> |

805 Standardized coefficient (Coef.), standard error (SE), *t*-value, and FDR-corrected *P*-value are shown for each explanatory variable in

806 Zurich, Switzerland and Otsu, Japan. Bold values highlight significant effects at  $P_{\text{fdr}} < 0.05$ .

807

808

809

810 **Table S2.** Effects of trichome density, presence of flowering stem, and initial plant size on insect abundance and community composition  
 811 in a comparison between glabrous mutants and their parental accessions.

| Zurich            |                            |              |             |              |                        | Otsu              |                     |              |             |              |                        |
|-------------------|----------------------------|--------------|-------------|--------------|------------------------|-------------------|---------------------|--------------|-------------|--------------|------------------------|
| Response          | Explanatory                | Coef.        | SE          | <i>t</i>     | <i>P</i> <sub>fd</sub> | Response          | Explanatory         | Coef.        | SE          | <i>t</i>     | <i>P</i> <sub>fd</sub> |
| Leaf holes        | <b>Trichome</b>            | <b>-0.42</b> | <b>0.14</b> | <b>-3.05</b> | <b>0.027</b>           | Turnip sawfly     | <b>Trichome</b>     | <b>-0.57</b> | <b>0.15</b> | <b>-3.94</b> | <b>0.002</b>           |
|                   | <b>Flowering</b>           | <b>-1.18</b> | <b>0.27</b> | <b>-4.40</b> | <b>0.001</b>           |                   | Flowering           | -0.42        | 0.29        | -1.46        | 0.397                  |
|                   | <b>Initial leaf length</b> | <b>0.42</b>  | <b>0.13</b> | <b>3.14</b>  | <b>0.021</b>           |                   | Initial leaf length | 0.23         | 0.16        | 1.44         | 0.318                  |
| Leaf chewer       | Trichome                   | -0.06        | 0.17        | -0.33        | 0.959                  | Leaf chewer       | <b>Trichome</b>     | <b>-0.47</b> | <b>0.15</b> | <b>-3.07</b> | <b>0.009</b>           |
|                   | Flowering                  | -0.19        | 0.33        | -0.57        | 0.812                  |                   | Flowering           | -0.43        | 0.30        | -1.40        | 0.397                  |
|                   | Initial leaf length        | 0.39         | 0.16        | 2.38         | 0.062                  |                   | Initial leaf length | 0.26         | 0.17        | 1.55         | 0.318                  |
| Specialist        | Trichome                   | 0.01         | 0.17        | 0.05         | 0.959                  | Specialist        | <b>Trichome</b>     | <b>-0.49</b> | <b>0.15</b> | <b>-3.16</b> | <b>0.009</b>           |
|                   | Flowering                  | 0.23         | 0.33        | 0.69         | 0.812                  |                   | Flowering           | -0.40        | 0.30        | -1.31        | 0.397                  |
|                   | Initial leaf length        | 0.32         | 0.16        | 1.95         | 0.068                  |                   | Initial leaf length | 0.26         | 0.17        | 1.58         | 0.318                  |
| Species richness  | Trichome                   | 0.01         | 0.17        | 0.05         | 0.959                  | Species richness  | Trichome            | -0.24        | 0.17        | -1.37        | 0.214                  |
|                   | Flowering                  | 0.08         | 0.34        | 0.24         | 0.812                  |                   | Flowering           | 0.12         | 0.34        | 0.36         | 0.722                  |
|                   | Initial leaf length        | 0.32         | 0.17        | 1.89         | 0.068                  |                   | Initial leaf length | 0.08         | 0.19        | 0.40         | 0.689                  |
| Shannon diversity | Trichome                   | -0.16        | 0.16        | -0.95        | 0.959                  | Shannon diversity | Trichome            | -0.17        | 0.18        | -0.97        | 0.339                  |
|                   | Flowering                  | -0.13        | 0.32        | -0.41        | 0.812                  |                   | Flowering           | 0.14         | 0.35        | 0.40         | 0.722                  |
|                   | Initial leaf length        | 0.36         | 0.16        | 2.25         | 0.062                  |                   | Initial leaf length | 0.13         | 0.19        | 0.71         | 0.582                  |

|                 |                     |      |      |      |       |                 |                     |              |             |              |              |
|-----------------|---------------------|------|------|------|-------|-----------------|---------------------|--------------|-------------|--------------|--------------|
| Total abundance | Trichome            | 0.04 | 0.17 | 0.22 | 0.959 | Total abundance | <b>Trichome</b>     | <b>-0.46</b> | <b>0.16</b> | <b>-2.86</b> | <b>0.011</b> |
|                 | Flowering           | 0.30 | 0.33 | 0.91 | 0.812 |                 | Flowering           | -0.16        | 0.32        | -0.52        | 0.722        |
|                 | Initial leaf length | 0.33 | 0.16 | 2.00 | 0.068 |                 | Initial leaf length | 0.18         | 0.17        | 1.03         | 0.468        |

---

812

813 Standardized coefficient (Coef.), standard error (SE), *t*-value, and FDR-corrected *P*-value are shown for each explanatory variable. Bold

814 values highlight significant effects at  $P_{\text{fdr}} < 0.05$ . NA means no data available. The trichome density presents differences between the null

815 and hypomorphic mutants. Because the trichome density had a significant effect on flea beetles and sawflies (Table S1), we focused on

816 species, guild, and community indices comprising these two leaf chewers.
